# Supplementary material for: Combined Ensemble Docking and Machine Learning in Identification of Therapeutic Agents with Potential Inhibitory Effect on Human CES1
Source: PubMed Central journal article supplement (PMC6696021; doi:10.3390/molecules24152747), 2019-07-29
Supplement: molecules-24-02747-s001.pdf [file molecules-24-02747-s001.pdf]

## Supplementary information

### Molecules repartition into the various groups

- 296 ligands with documented  $K_i$  from ChEMBL, from which:
  - 232 ligands assigned to the training group (80%)
  - 64 ligands assigned to the testing group (20 %)
- For all docked ligands:
  - 3 poses produced
- Drugbank: 6631 molecules downloaded
  - 148 could not be parsed by RDKit
  - 232 molecules that could not be docked by Vina (eg: all molecules with inorganic atoms)
  - 5078 non-FDA approved molecules, not used (eg: experimental drugs, illicit drugs)
  - 291 FDA approved nutraceuticals, not used (eg: vitamin C, tetrahydrofolate)
  - **1114 FDA approved drugs, used in the analysis.**

### Redocking of the co-crystallised ligands of the PDB structures

| CES1 structure                                                                                      | 1MX5                                                                                | 1MX9                                                                                | 1YA4                                                                                | 1YA8                                                                                  | 1YAH                                                                                  |
|-----------------------------------------------------------------------------------------------------|-------------------------------------------------------------------------------------|-------------------------------------------------------------------------------------|-------------------------------------------------------------------------------------|---------------------------------------------------------------------------------------|---------------------------------------------------------------------------------------|
| <b>Ligand</b>                                                                                       | Homatropine                                                                         | Naloxone                                                                            | Tamoxifen                                                                           | Mevastatin                                                                            | Ethyl acetate                                                                         |
| <b>Ligand 2D structure</b>                                                                          | 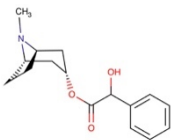 |  |  |  |  |
| Redocking applicable?                                                                               | Yes                                                                                 | Yes                                                                                 | Yes                                                                                 | No, cleavage products                                                                 | Yes                                                                                   |
| <b>RMSD</b> between crystalized ligands and the best docked pose (Angstrom range on the best poses) | 1.5                                                                                 | 4.5                                                                                 | 7.2                                                                                 | N/A                                                                                   | 4.7                                                                                   |
| <b>Score of best pose</b> (~estimated Gibbs energy of binding in kcal/mol)                          | -8.4                                                                                | -7.9                                                                                | -8.2                                                                                | -8.0                                                                                  | -3.6                                                                                  |

| Structure                                                                                           | 1YAJ                                                                              | 2DQY                                                                               | 2DQZ                                                                               | 2DR0                                                                                | 2H7C                                                                                |
|-----------------------------------------------------------------------------------------------------|-----------------------------------------------------------------------------------|------------------------------------------------------------------------------------|------------------------------------------------------------------------------------|-------------------------------------------------------------------------------------|-------------------------------------------------------------------------------------|
| <b>Ligand</b>                                                                                       | Benzil                                                                            | Cholate<br>Palmitate                                                               | Homatropine<br>Coenzyme A<br>Palmitate                                             | Taurocholate                                                                        | Coenzyme A                                                                          |
| <b>Ligand 2D structure</b>                                                                          | 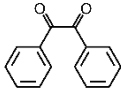 |  |  |  |  |
| Redocking applicable?                                                                               | Yes                                                                               | No<br>(outside active site)                                                        | Yes<br>(Palmitate)                                                                 | Yes                                                                                 | Yes                                                                                 |
| <b>RMSD</b> between crystalized ligands and the best docked pose (Angstrom range on the best poses) | 3.5                                                                               | N/A                                                                                | 3.7                                                                                | 6.5                                                                                 | 8.7                                                                                 |
| <b>Vina score of best pose</b> (~estimated Gibbs energy of binding in kcal/mol)                     | -5.2                                                                              | -8.0                                                                               | -5.3                                                                               | -9.2                                                                                | -7.2                                                                                |

Figure S1: Tabulated results of the redocking of the co-crystallised ligand of each PDB structure, done on Autodock Vina with the same settings as in the main matter.

### Active site characterization according to fpocket 3.0

Default settings except for clustering distance (2.8 angstrom), leading to slightly overestimated volume and SASA, but yielding one and only one detected pocket covering the active site, allowing for structure-to-structure comparisons. (Addition of the value of multiple pocket is non-ideal for comparison purpose)

| Structure                                       | 1YAH       | 1YAJ       | 1YA8       | 2DQZ       | 1YA4       | 2H7C        | 1MX5        | 2DR0        | 2DQY        | 1MX9        |
|-------------------------------------------------|------------|------------|------------|------------|------------|-------------|-------------|-------------|-------------|-------------|
| <b>Volume</b><br>(active site, Å <sup>3</sup> ) | <b>701</b> | <b>795</b> | <b>950</b> | <b>958</b> | <b>984</b> | <b>1015</b> | <b>1071</b> | <b>1078</b> | <b>1157</b> | <b>1375</b> |
| <b>Total SASA</b>                               | <b>185</b> | <b>189</b> | <b>227</b> | <b>224</b> | <b>222</b> | <b>274</b>  | <b>276</b>  | <b>258</b>  | <b>269</b>  | <b>356</b>  |
| Polar SASA                                      | 43         | 34         | 59         | 60         | 72         | 98          | 85          | 71          | 71          | 103         |
| Apolar SASA                                     | 142        | 155        | 168        | 164        | 150        | 176         | 191         | 187         | 198         | 253         |

Figure S2: Active site volume and SASA for each structure, according to fpocket

|                                                                                                                          | Complete dataset<br>except ligands with Ki between<br>5 and 15 μM | Complete dataset |
|--------------------------------------------------------------------------------------------------------------------------|-------------------------------------------------------------------|------------------|
| <b>Threshold</b>                                                                                                         | <b>10 μM</b>                                                      | <b>10 μM</b>     |
| <b>Number of active ligands</b>                                                                                          | 135 (50%)                                                         | 140 (47%)        |
| <b>Vina score only (no statistical model)</b><br>Ensemble AUC (complete set)<br>Best AUC among all individual structures | 0.55<br>0.60                                                      | 0.57<br>0.62     |
| <b>Ensemble MLP model</b><br>AUC (std. dev.) 5CV (training set)                                                          | 0.83 (0.02)                                                       | 0.81 (0.03)      |
| <b>Ensemble LDA model</b><br>AUC (std. dev.) 5CV (training set)                                                          | 0.77 (0.07)                                                       | 0.77 (0.08)      |
| <b>Ensemble QDA model</b><br>AUC (std. dev.) 5CV (training set)                                                          | 0.77 (0.06)                                                       | 0.77 (0.08)      |

Figure S3: Comparison of the MLP, QDA and LDA models removing ligands with an activity between 5 μM and 15 μM.

Table S1: 294 compounds with known activity on CEN1 gathered in ChEMBL database.

| Set      | Name          | SMILES                   | Ki Nanomolar | Vina Score Best | Vina Comp. Gauss1 | Vina Comp. Gauss2 | Vina Comp. Repulsion | Vina Comp. Hydrophobic | Vina Comp. Hydrogen |
|----------|---------------|--------------------------|--------------|-----------------|-------------------|-------------------|----------------------|------------------------|---------------------|
| Training | CHEMBL467451  | CCCCCCCCC(=O)O=C(O)C(F)F | 397.32       | -7.4775         | 80.56594          | 1366.81469        | 2.08905              | 72.65263               | 3.40717             |
| Training | CHEMBL465356  | CCCCCCCCC(=O)O=C(O)C(F)F | 652.93       | -7.2284         | 86.86014          | 1410.26186        | 1.90733              | 76.4488                | 2.9057              |
| Training | CHEMBL510988  | CC(C)O=C(O)C(F)F         | 6904.93      | -7.21091        | 59.2926           | 1062.61109        | 2.21091              | 82.21091               | 1.68499             |
| Training | CHEMBL270375  | CCCCCCCCC(=O)O=C(F)F     | 39.1         | -6.5294         | 79.59238          | 1311.69721        | 0.93567              | 83.71262               | 0.96949             |
| Training | BENZIL        | O=C(O)C(=O)c1ccccc1      | 43.89        | -8.14459        | 59.13861          | 1034.93222        | 0.59384              | 76.17376               | 0.52242             |
| Training | CHEMBL192780  | Cc1ccc(O)cc1             | 37.02        | -8.2064         | 57.27003          | 1108.01636        | 1.24201              | 55.49481               | 2.29183             |
| Training | CHEMBL235207  | Cc1ccc(O)cc1             | 38.4         | -8.2064         | 57.27003          | 1108.01636        | 1.24201              | 55.49481               | 2.29183             |
| Training | CHEMBL244238  | Fc1ccc(O)cc1             | 38.4         | -8.2064         | 57.27003          | 1108.01636        | 1.24201              | 55.49481               | 2.29183             |
| Training | CHEMBL192139  | O=C(O)C(=O)F             | 25091.39     | -6.7776         | 64.22778          | 1161.60784        | 1.50946              | 58.13234               | 1.94546             |
| Training | CHEMBL244248  | O=C(O)C(=O)F             | 256.02       | -6.93468        | 66.12775          | 1270.59123        | 0.58962              | 60.1098                | 0.34716             |
| Training | CHEMBL242721  | Fc1ccc(O)cc1             | 191.12       | -10.8485        | 67.69417          | 1417.1904         | 1.24103              | 54.93531               | 0                   |
| Training | CHEMBL191847  | Fc1ccc(O)cc1             | 260          | -6.92006        | 72.87742          | 1288.83609        | 0.84302              | 69.15322               | 0.50963             |
| Training | CHEMBL191847  | Fc1ccc(O)cc1             | 223.16       | -6.23514        | 63.04967          | 1030.30756        | 0.81874              | 65.4579                | 1.35734             |
| Training | CHEMBL191847  | Fc1ccc(O)cc1             | 404.51       | -6.53344        | 75.40365          | 1388.10758        | 1.48017              | 63.94381               | 0.61831             |
| Training | CHEMBL370439  | O=C(O)C(=O)F             | 524.4        | -6.7776         | 64.22778          | 1233.38173        | 1.50946              | 58.13234               | 1.94546             |
| Training | CHEMBL244830  | O=C(O)C(=O)F             | 665          | -10.07944       | 78.50125          | 1399.58339        | 0.93291              | 66.05758               | 0.61577             |
| Training | CHEMBL365445  | O=C(O)C(=O)F             | 433.27       | -6.42513        | 49.87783          | 903.32178         | 1.03147              | 60.1098                | 2.22339             |
| Training | CHEMBL365445  | O=C(O)C(=O)F             | 880          | -7.32199        | 47.89912          | 837.96538         | 1.05287              | 26.21467               | 2.15351             |
| Training | CHEMBL1812859 | O=C(O)C(=O)F             | 1550         | -6.9484         | 53.82762          | 770.28079         | 1.18672              | 54.8266                | 1.68869             |
| Training | CHEMBL426562  | CC(=O)N(C)C(=O)O         | 1830         | -9.14329        | 64.83756          | 1374.95911        | 0.53909              | 76.21014               | 0                   |
| Training | MILTRONE      | CC(=O)N(C)C(=O)O         | 260          | -10.66835       | 70.77882          | 1330.62865        | 3.67133              | 102.63468              | 0.61589             |
| Training | CHEMBL483875  | O=C(O)C(=O)F             | 3427.5       | -6.23073        | 57.42444          | 1037.2793         | 0.82835              | 60.5099                | 0                   |
| Training | CHEMBL481111  | O=C(O)C(=O)F             | 100000       | -9.83055        | 77.62663          | 1657.85055        | 1.44855              | 51.18984               | 0.27756             |
| Training | CHEMBL1638165 | O=C(O)C(=O)F             | 100000       | -10.50634       | 102.85747         | 1816.02934        | 1.35154              | 71.64464               | 0.69414             |
| Training | CHEMBL365392  | O=C(O)C(=O)F             | 100000       | -6.97372        | 107.7691          | 1165.62374        | 1.8414               | 71.68072               | 0.46866             |
| Training | CHEMBL365392  | O=C(O)C(=O)F             | 100000       | -6.97372        | 107.7691          | 1165.62374        | 1.8414               | 71.68072               | 0.46866             |
| Training | CHEMBL191796  | O=C(O)C(=O)F             | 100000       | -6.97372        | 107.7691          | 1165.62374        | 1.8414               | 71.68072               | 0.46866             |
| Training | CHEMBL222984  | O=C(O)C(=O)F             | 100000       | -6.97372        | 107.7691          | 1165.62374        | 1.8414               | 71.68072               | 0.46866             |
| Training | CHEMBL191796  | O=C(O)C(=O)F             | 100000       | -6.97372        | 107.7691          | 1165.62374        | 1.8414               | 71.68072               | 0.46866             |
| Training | CHEMBL222984  | O=C(O)C(=O)F             | 100000       | -6.97372        | 107.7691          | 1165.62374        | 1.8414               | 71.68072               | 0.46866             |
| Training | CHEMBL191796  | O=C(O)C(=O)F             | 100000       | -6.97372        | 107.7691          | 1165.62374        | 1.8414               | 71.68072               | 0.46866             |
| Training | CHEMBL222984  | O=C(O)C(=O)F             | 100000       | -6.97372        | 107.7691          | 1165.62374        | 1.8414               | 71.68072               | 0.46866             |
| Training | CHEMBL191796  | O=C(O)C(=O)F             | 100000       | -6.97372        | 107.7691          | 1165.62374        | 1.8414               | 71.68072               | 0.46866             |
| Training | CHEMBL222984  | O=C(O)C(=O)F             | 100000       | -6.97372        | 107.7691          | 1165.62374        | 1.8414               | 71.68072               | 0.46866             |
| Training | CHEMBL191796  | O=C(O)C(=O)F             | 100000       | -6.97372        | 107.7691          | 1165.62374        | 1.8414               | 71.68072               | 0.46866             |
| Training | CHEMBL222984  | O=C(O)C(=O)F             | 100000       | -6.97372        | 107.7691          | 1165.62374        | 1.8414               | 71.68072               | 0.46866             |
| Training | CHEMBL191796  | O=C(O)C(=O)F             | 100000       | -6.97372        | 107.7691          | 1165.62374        | 1.8414               | 71.68072               | 0.46866             |
| Training | CHEMBL222984  | O=C(O)C(=O)F             | 100000       | -6.97372        | 107.7691          | 1165.62374        | 1.8414               | 71.68072               | 0.46866             |
| Training | CHEMBL191796  | O=C(O)C(=O)F             | 100000       | -6.97372        | 107.7691          | 1165.62374        | 1.8414               | 71.68072               | 0.46866             |
| Training | CHEMBL222984  | O=C(O)C(=O)F             | 100000       | -6.97372        | 107.7691          | 1165.62374        | 1.8414               | 71.68072               | 0.46866             |
| Training | CHEMBL191796  | O=C(O)C(=O)F             | 100000       | -6.97372        | 107.7691          | 1165.62374        | 1.8414               | 71.68072               | 0.46866             |
| Training | CHEMBL222984  | O=C(O)C(=O)F             | 100000       | -6.97372        | 107.7691          | 1165.62374        | 1.8414               | 71.68072               | 0.46866             |
| Training | CHEMBL191796  | O=C(O)C(=O)F             | 100000       | -6.97372        | 107.7691          | 1165.62374        | 1.8414               | 71.68072               | 0.46866             |
| Training | CHEMBL222984  | O=C(O)C(=O)F             | 100000       | -6.97372        | 107.7691          | 1165.62374        | 1.8414               | 71.68072               | 0.46866             |
| Training | CHEMBL191796  | O=C(O)C(=O)F             | 100000       | -6.97372        | 107.7691          | 1165.62374        | 1.8414               | 71.68072               | 0.46866             |
| Training | CHEMBL222984  | O=C(O)C(=O)F             | 100000       | -6.97372        | 107.7691          | 1165.62374        | 1.8414               | 71.68072               | 0.46866             |
| Training | CHEMBL191796  | O=C(O)C(=O)F             | 100000       | -6.97372        | 107.7691          | 1165.62374        | 1.8414               | 71.68072               | 0.46866             |
| Training | CHEMBL222984  | O=C(O)C(=O)F             | 100000       | -6.97372        | 107.7691          | 1165.62374        | 1.8414               | 71.68072               | 0.46866             |
| Training | CHEMBL191796  | O=C(O)C(=O)F             | 100000       | -6.97372        | 107.7691          | 1165.62374        | 1.8414               | 71.68072               | 0.46866             |
| Training | CHEMBL222984  | O=C(O)C(=O)F             | 100000       | -6.97372        | 107.7691          | 1165.62374        | 1.8414               | 71.68072               | 0.46866             |
| Training | CHEMBL191796  | O=C(O)C(=O)F             | 100000       | -6.97372        | 107.7691          | 1165.62374        | 1.8414               | 71.68072               | 0.46866             |
| Training | CHEMBL222984  | O=C(O)C(=O)F             | 100000       | -6.97372        | 107.7691          | 1165.62374        | 1.8414               | 71.68072               | 0.46866             |
| Training | CHEMBL191796  | O=C(O)C(=O)F             | 100000       | -6.97372        | 107.7691          | 1165.62374        | 1.8414               | 71.68072               | 0.46866             |
| Training | CHEMBL222984  | O=C(O)C(=O)F             | 100000       | -6.97372        | 107.7691          | 1165.62374        | 1.8414               | 71.68072               | 0.46866             |
| Training | CHEMBL191796  | O=C(O)C(=O)F             | 100000       | -6.97372        | 107.7691          | 1165.62374        | 1.8414               | 71.68072               | 0.46866             |
| Training | CHEMBL222984  | O=C(O)C(=O)F             | 100000       | -6.97372        | 107.7691          | 1165.62374        | 1.8414               | 71.68072               | 0.46866             |
| Training | CHEMBL191796  | O=C(O)C(=O)F             | 100000       | -6.97372        | 107.7691          | 1165.62374        | 1.8414               | 71.68072               | 0.46866             |
| Training | CHEMBL222984  | O=C(O)C(=O)F             | 100000       | -6.97372        | 107.7691          | 1165.62374        | 1.8414               | 71.68072               | 0.46866             |
| Training | CHEMBL191796  | O=C(O)C(=O)F             | 100000       | -6.97372        | 107.7691          | 1165.62374        | 1.8414               | 71.68072               | 0.46866             |
| Training | CHEMBL222984  | O=C(O)C(=O)F             | 100000       | -6.97372        | 107.7691          | 1165.62374        | 1.8414               | 71.68072               | 0.46866             |
| Training | CHEMBL191796  | O=C(O)C(=O)F             | 100000       | -6.97372        | 107.7691          | 1165.62374        | 1.8414               | 71.68072               | 0.46866             |
| Training | CHEMBL222984  | O=C(O)C(=O)F             | 100000       | -6.97372        | 107.7691          | 1165.62374        | 1.8414               | 71.68072               | 0.46866             |
| Training | CHEMBL191796  | O=C(O)C(=O)F             | 100000       | -6.97372        | 107.7691          | 1165.62374        | 1.8414               | 71.68072               | 0.46866             |
| Training | CHEMBL222984  | O=C(O)C(=O)F             | 100000       | -6.97372        | 107.7691          | 1165.62374        | 1.8414               | 71.68072               | 0.46866             |
| Training | CHEMBL191796  | O=C(O)C(=O)F             | 100000       | -6.97372        | 107.7691          | 1165.62374        | 1.8414               | 71.68072               | 0.46866             |
| Training | CHEMBL222984  | O=C(O)C(=O)F             | 100000       | -6.97372        | 107.7691          | 1165.62374        | 1.8414               | 71.68072               | 0.46866             |
| Training | CHEMBL191796  | O=C(O)C(=O)F             | 100000       | -6.97372        | 107.7691          | 1165.62374        | 1.8414               | 71.68072               | 0.46866             |
| Training | CHEMBL222984  | O=C(O)C(=O)F             | 100000       | -6.97372        | 107.7691          | 1165.62374        | 1.8414               | 71.68072               | 0.46866             |
| Training | CHEMBL191796  | O=C(O)C(=O)F             | 100000       | -6.97372        | 107.7691          | 1165.62374        | 1.8414               | 71.68072               | 0.46866             |
| Training | CHEMBL222984  | O=C(O)C(=O)F             | 100000       | -6.97372        | 107.7691          | 1165.62374        | 1.8414               | 71.68072               | 0.46866             |
| Training | CHEMBL191796  | O=C(O)C(=O)F             | 100000       | -6.97372        | 107.7691          | 1165.62374        | 1.8414               | 71.68072               | 0.46866             |
| Training | CHEMBL222984  | O=C(O)C(=O)F             | 100000       | -6.97372        | 107.7691          | 1165.62374        | 1.8414               | 71.68072               | 0.46866             |
| Training | CHEMBL191796  | O=C(O)C(=O)F             | 100000       | -6.97372        | 107.7691          | 1165.62374        | 1.8414               | 71.68072               | 0.46866             |
| Training | CHEMBL222984  | O=C(O)C(=O)F             | 100000       | -6.97372        | 107.7691          | 1165.62374        | 1.8414               | 71.68072               | 0.46866             |
| Training | CHEMBL191796  | O=C(O)C(=O)F             | 100000       | -6.97372        | 107.7691          | 1165.62374        | 1.8414               | 71.68072               | 0.46866             |
| Training | CHEMBL222984  | O=C(O)C(=O)F             | 100000       | -6.97372        | 107.7691          | 1165.62374        | 1.8414               | 71.68072               | 0.46866             |
| Training | CHEMBL191796  | O=C(O)C(=O)F             | 100000       | -6.97372        | 107.7691          | 1165.62374        | 1.8414               | 71.68072               | 0.46866             |
| Training | CHEMBL222984  | O=C(O)C(=O)F             | 100000       | -6.97372        | 107.7691          | 1165.62374        | 1.8414               | 71.68072               | 0.46866             |
| Training | CHEMBL191796  | O=C(O)C(=O)F             | 100000       | -6.97372        | 107.7691          | 1165.62374        | 1.8414               | 71.68072               | 0.46866             |
| Training | CHEMBL222984  | O=C(O)C(=O)F             | 100000       | -6.97372        | 107.7691          | 1165.62374        | 1.8414               | 71.68072               | 0.46866             |
| Training | CHEMBL191796  | O=C(O)C(=O)F             | 100000       | -6.97372        | 107.7691          | 1165.62374        | 1.8414               | 71.68072               | 0.46866             |
| Training | CHEMBL222984  | O=C(O)C(=O)F             | 100000       | -6.97372        | 107.7691          | 1165.62374        | 1.8414               | 71.68072               | 0.46866             |
| Training | CHEMBL191796  | O=C(O)C(=O)F             | 100000       | -6.97372        | 107.7691          | 1165.62374        | 1.8414               | 71.68072               | 0.46866             |
| Training | CHEMBL222984  | O=C(O)C(=O)F             | 100000       | -6.97372        | 107.7691          | 1165.62374        | 1.8414               | 71.68072               | 0.46866             |
| Training | CHEMBL191796  | O=C(O)C(=O)F             | 100000       | -6.97372        | 107.7691          | 1165.62374        | 1.8414               | 71.68072               | 0.46866             |
| Training | CHEMBL222984  | O=C(O)C(=O)F             | 100000       | -6.97372        | 107.7691          | 1165.62374        | 1.8414               | 71.68072               | 0.46866             |
| Training | CHEMBL191796  | O=C(O)C(=O)F             | 100000       | -6.97372        | 107.7691          | 1165.62374        | 1.8414               | 71.68072               | 0.46866             |
| Training | CHEMBL222984  | O=C(O)C(=O)F             | 100000       | -6.97372        | 107.7691          | 1165.62374        | 1.8414               | 71.68072               | 0.46866             |
| Training | CHEMBL191796  | O=C(O)C(=O)F             | 100000       | -6.97372        | 107.              |                   |                      |                        |                     |

| Tranino | CHEMBL221512              | CCCCCCCCCCCCCCCC(C)C(=O)C(=O)C2=CCCC2    | All     | D8=8 | Molecules | -8.01086  | 107.72723  | 1638.17746 | 1.74296   | 111.43841 | 0.53431 |
|---------|---------------------------|------------------------------------------|---------|------|-----------|-----------|------------|------------|-----------|-----------|---------|
| Tranino | CHEMBL222712              | Cc1ccc(NC(=O)C(=O)C)cc1                  | 419     |      | -9.00815  | 69.41511  | 127.98911  | 2.87281    | 6.6288    | 2.86838   |         |
| Tranino | CHEMBL1812852             | Bc1C(C)C(=O)C(=O)C1=CCCC2=CCCC2          | 2630    |      | -9.11049  | 71.18444  | 1210.43703 | 1.39181    | 87.48844  | 1.87402   |         |
| Tranino | CHEMBL1812850             | O=C(C)C(=O)C(=O)C(=O)C2=CCCC2            | 610     |      | -9.01239  | 69.32227  | 1158.5353  | 1.01203    | 82.83272  | 1.95684   |         |
| Tranino | CHEMBL398977              | O=C(C)C(=O)C(=O)C(=O)C1=CCCC2=CCCC2      | 2130    |      | -8.87956  | 57.89638  | 1146.65825 | 0.97402    | 67.2408   | 1.00359   |         |
| Tranino | TANSHINONEA               | Cc1ccc(NC(=O)C(=O)C(=O)C(=O)C)cc1        | 1200    |      | -9.00815  | 69.41511  | 127.98911  | 2.87281    | 6.6288    | 2.86838   |         |
| Tranino | CHEMBL222999              | CN(C)C(=O)C(=O)C(=O)C2=CCCC2             | 2280    |      | -7.02208  | 38.97218  | 794.36285  | 0.96735    | 31.0567   | 2.16367   |         |
| Tranino | CHEMBL376290              | Cc1ccc(NC(=O)C(=O)C)cc1                  | 3410    |      | -7.28886  | 44.74798  | 834.10486  | 1.14101    | 40.14914  | 1.60746   |         |
| Tranino | CHEMBL222849              | O=C(N)C(=O)C(=O)C(=O)C2=CCCC2            | 10000   |      | -8.25688  | 53.72657  | 1180.0811  | 1.19354    | 34.44219  | 1.73797   |         |
| Tranino | CHEMBL192913              | Cc1ccc(NC(=O)C)cc1                       | 800     |      | -5.59867  | 37.68361  | 693.24969  | 1.32922    | 54.53769  | 0.85916   |         |
| Tranino | CHEMBL191739              | O=C(N)C(=O)C(=O)C(=O)C2=CCCC2            | 10000   |      | -8.50545  | 74.90242  | 1398.40239 | 2.35987    | 39.73345  | 3.55997   |         |
| Tranino | CHEMBL482640              | Cc1ccc(NC(=O)C(=O)C)cc1                  | 10000   |      | -9.70491  | 80.87825  | 1652.39388 | 2.06907    | 47.68055  | 3.03537   |         |
| Tranino | CHEMBL483470              | Cc1ccc(NC(=O)C(=O)C)cc1                  | 10000   |      | -9.39526  | 76.67202  | 1655.08703 | 1.0228     | 64.15714  | 0         |         |
| Tranino | CHEMBL489076              | Fc1ccc(NC(=O)C(=O)C)cc1                  | 10000   |      | -8.82342  | 49.62928  | 784.86742  | 1.21077    | 24.17882  | 2.79277   |         |
| Tranino | CHEMBL491256              | O=C(N)C(=O)C(=O)C(=O)C2=CCCC2            | 10000   |      | -12.4223  | 113.4273  | 1948.04627 | 2.27129    | 107.64897 | 0         |         |
| Tranino | CHEMBL395652              | Cc1ccc(NC(=O)C(=O)C)cc1                  | 10000   |      | -9.73159  | 69.11409  | 1264.66116 | 0.93945    | 85.85233  | 0.39799   |         |
| Tranino | Dihydro-TANSHINONEI       | Cc1ccc(NC(=O)C(=O)C)cc1                  | 398     |      | -10.47049 | 79.48147  | 1328.36748 | 2.92162    | 54.49782  | 1.16527   |         |
| Tranino | CHEMBL191284              | Cc1ccc(NC(=O)C)cc1                       | 800     |      | -5.11933  | 42.67861  | 693.24969  | 1.32922    | 54.53769  | 0.85916   |         |
| Tranino | CHEMBL364588              | CCCCC(=O)C(=O)C                          | 16900   |      | -5.21158  | 41.83676  | 588.52844  | 0.71616    | 35.71157  | 2.14004   |         |
| Tranino | TANSHINONEI               | Cc1ccc(NC(=O)C(=O)C)cc1                  | 26250   |      | -11.53381 | 75.47291  | 1329.89692 | 1.99872    | 88.7735   | 0.95555   |         |
| Tranino | CHEMBL223001              | O=C(N)C(=O)C(=O)C(=O)C2=CCCC2            | 3600    |      | -7.50212  | 36.92989  | 897.25844  | 0.78       | 30.44188  | 1.95723   |         |
| Tranino | CHEMBL192913              | Cc1ccc(NC(=O)C)cc1                       | 800     |      | -5.59867  | 37.68361  | 693.24969  | 1.32922    | 54.53769  | 0.85916   |         |
| Tranino | DIPHENYLTHANEDIOLAT       | O=C(N)C(=O)C(=O)C(=O)C2=CCCC2            | 10000   |      | -8.26606  | 62.35021  | 1170.24322 | 1.42793    | 2.5803    | 2.5803    |         |
| Tranino | CHEMBL483072              | Cc1ccc(NC(=O)C(=O)C)cc1                  | 10000   |      | -10.79531 | 96.60327  | 1773.2953  | 1.65207    | 76.22325  | 1.22252   |         |
| Tranino | CHEMBL483468              | Cc1ccc(NC(=O)C(=O)C)cc1                  | 10000   |      | -8.86894  | 56.84396  | 1067.00966 | 2.93911    | 75.29491  | 0.19153   |         |
| Tranino | CHEMBL484628              | Cc1ccc(NC(=O)C(=O)C)cc1                  | 10000   |      | -10.1318  | 97.3233   | 1756.28232 | 1.1887     | 61.10077  | 6.85353   |         |
| Tranino | CHEMBL485106              | Fc1ccc(NC(=O)C(=O)C)cc1                  | 10000   |      | -10.1721  | 95.69187  | 1780.82797 | 1.32922    | 68.5749   | 0.16486   |         |
| Tranino | CHEMBL487299              | O=C(N)C(=O)C(=O)C(=O)C2=CCCC2            | 10000   |      | -11.5145  | 115.52027 | 1931.30379 | 3.99641    | 66.83904  | 3.04228   |         |
| Tranino | CHEMBL223001              | O=C(N)C(=O)C(=O)C(=O)C2=CCCC2            | 10000   |      | -9.81241  | 60.85324  | 1046.0466  | 0.67649    | 34.82203  | 0         |         |
| Tranino | CHEMBL484628              | Cc1ccc(NC(=O)C(=O)C)cc1                  | 10000   |      | -7.82211  | 63.52575  | 1040.2673  | 1.11783    | 45.98303  | 1.65776   |         |
| Tranino | CHEMBL485106              | Fc1ccc(NC(=O)C(=O)C)cc1                  | 10000   |      | -10.1721  | 95.69187  | 1780.82797 | 1.32922    | 68.5749   | 0.16486   |         |
| Tranino | CHEMBL487299              | O=C(N)C(=O)C(=O)C(=O)C2=CCCC2            | 10000   |      | -11.5145  | 115.52027 | 1931.30379 | 3.99641    | 66.83904  | 3.04228   |         |
| Tranino | CHEMBL225169              | O=C(N)C(=O)C(=O)C(=O)C2=CCCC2            | 10000   |      | -9.81241  | 60.85324  | 1046.0466  | 0.67649    | 34.82203  | 0         |         |
| Tranino | CHEMBL437373              | O=C(N)C(=O)C(=O)C(=O)C2=CCCC2            | 170     |      | -9.32419  | 66.65619  | 1266.183   | 0.96456    | 64.63266  | 1.04354   |         |
| Tranino | CHEMBL242769              | O=C(N)C(=O)C(=O)C(=O)C2=CCCC2            | 990     |      | -8.86815  | 62.22238  | 1156.88202 | 0.60485    | 72.59447  | 0.35214   |         |
| Tranino | CHEMBL374970              | CCCCC(=O)C(=O)C(=O)C2=CCCC2              | 760     |      | -10.35715 | 75.11638  | 1404.29163 | 2.39885    | 64.56504  | 2.83148   |         |
| Tranino | CHEMBL223785              | O=C(N)C(=O)C(=O)C(=O)C2=CCCC2            | 10000   |      | -8.00159  | 47.64461  | 1058.84915 | 1.04872    | 40.89518  | 2.26171   |         |
| Tranino | CHEMBL223785              | O=C(N)C(=O)C(=O)C(=O)C2=CCCC2            | 10000   |      | -8.0779   | 45.07508  | 832.68627  | 1.04356    | 21.58913  | 2.46224   |         |
| Tranino | CHEMBL236337              | O=C(N)C(=O)C(=O)C(=O)C2=CCCC2            | 10000   |      | -8.3276   | 63.55114  | 1145.47811 | 1.36635    | 70.10101  | 0.26222   |         |
| Tranino | CHEMBL223785              | O=C(N)C(=O)C(=O)C(=O)C2=CCCC2            | 10000   |      | -7.84442  | 60.5329   | 1171.1446  | 1.02305    | 32.2073   | 1.10103   |         |
| Tranino | CHEMBL515326              | Cc1ccc(NC(=O)C(=O)C)cc1                  | 10000   |      | -10.58183 | 88.89447  | 1726.33829 | 1.09882    | 81.8099   | 0.43704   |         |
| Tranino | CHEMBL482639              | Fc1ccc(NC(=O)C(=O)C)cc1                  | 10000   |      | -9.91398  | 84.37457  | 1675.74195 | 1.42618    | 62.59533  | 1.2816    |         |
| Tranino | CHEMBL487303              | Brc1ccc(NC(=O)C(=O)C)cc1                 | 10000   |      | -9.37614  | 109.30549 | 1613.82843 | 2.74307    | 68.75286  | 0.59196   |         |
| Tranino | 5-FURICOLICACID           | Cc1ccc(NC(=O)C(=O)C)cc1                  | 10000   |      | -8.98931  | 42.62993  | 764.89994  | 1.04356    | 23.7442   | 2.74282   |         |
| Tranino | CHEMBL451609              | Brc1ccc(NC(=O)C(=O)C)cc1                 | 10000   |      | -9.48624  | 94.88829  | 1540.82115 | 3.94211    | 79.51929  | 2.48209   |         |
| Tranino | VALPROICACID              | CCCCC(=O)C(=O)C                          | 10000   |      | -5.44203  | 47.6216   | 634.47801  | 0.8894     | 41.21551  | 2.33102   |         |
| Tranino | CHEMBL191284              | CCCCC(=O)C(=O)C                          | 102     |      | -8.59861  | 57.39825  | 823.73328  | 0.39508    | 65.68831  | 0.337     |         |
| Tranino | CHEMBL244428              | Cc1ccc(NC(=O)C(=O)C)cc1                  | 190     |      | -10.1937  | 90.35937  | 1284.12275 | 1.85871    | 67.53681  | 1.45941   |         |
| Tranino | CHEMBL242722              | Fc1ccc(NC(=O)C(=O)C)cc1                  | 327     |      | -10.58229 | 79.716    | 1390.05631 | 0.83413    | 64.81354  | 0.43616   |         |
| Tranino | CHEMBL1629724             | Fc1ccc(NC(=O)C(=O)C)cc1                  | 430     |      | -10.50789 | 113.47581 | 1768.30686 | 2.21399    | 79.35597  | 0.209     |         |
| Tranino | 1,2,3,4-TETRAHYDROQUINONE | O=C1C=CC(=O)C=C1                         | 930     |      | -7.39528  | 40.54525  | 790.70736  | 1.04784    | 38.06613  | 2.40279   |         |
| Tranino | CHEMBL244428              | Cc1ccc(NC(=O)C(=O)C)cc1                  | 1370    |      | -9.91398  | 84.37457  | 1675.74195 | 1.42618    | 62.59533  | 1.2816    |         |
| Tranino | CHEMBL222891              | O=C(N)C(=O)C(=O)C(=O)C2=CCCC2            | 10000   |      | -7.82257  | 45.24851  | 900.62984  | 1.02882    | 32.11835  | 2.21126   |         |
| Tranino | CHEMBL191676              | CN(C)C(=O)C(=O)C(=O)C2=CCCC2             | 10000   |      | -8.44461  | 70.08946  | 1367.68077 | 0.40889    | 48.81885  | 0         |         |
| Tranino | CHEMBL191688              | O=C(N)C(=O)C(=O)C(=O)C2=CCCC2            | 10000   |      | -5.93398  | 56.65883  | 658.46768  | 1.65993    | 32.3165   | 0.5927    |         |
| Tranino | CHEMBL191688              | O=C(N)C(=O)C(=O)C(=O)C2=CCCC2            | 10000   |      | -9.91398  | 84.37457  | 1675.74195 | 1.42618    | 62.59533  | 1.2816    |         |
| Tranino | CHEMBL396205              | O=C(N)C(=O)C(=O)C(=O)C2=CCCC2            | 10000   |      | -8.82981  | 78.37249  | 1283.23772 | 2.50857    | 64.29995  | 1.40238   |         |
| Tranino | CHEMBL1812856             | CCCCC(=O)C(=O)C                          | 3       |      | -6.24754  | 54.93243  | 932.99514  | 1.26881    | 56.5105   | 1.35328   |         |
| Tranino | CHEMBL192592              | Brc1ccc(NC(=O)C(=O)C)cc1                 | 71      |      | -7.1984   | 57.17362  | 1027.23339 | 1.43129    | 41.4575   | 2.24494   |         |
| Tranino | PHENYLACETICACID          | Cc1ccc(NC(=O)C)cc1                       | 148     |      | -8.00159  | 47.64461  | 1058.84915 | 1.04872    | 40.89518  | 2.26171   |         |
| Tranino | CHEMBL192913              | Cc1ccc(NC(=O)C)cc1                       | 800     |      | -5.59867  | 37.68361  | 693.24969  | 1.32922    | 54.53769  | 0.85916   |         |
| Tranino | CHEMBL482848              | Brc1ccc(NC(=O)C(=O)C)cc1                 | 10000   |      | -9.90777  | 95.82121  | 1664.5705  | 2.32445    | 68.29336  | 1.61678   |         |
| Tranino | CHEMBL1639899             | O=C(N)C(=O)C(=O)C(=O)C2=CCCC2            | 10000   |      | -9.1262   | 94.90246  | 1587.44173 | 1.89586    | 57.82136  | 0.35206   |         |
| Tranino | CHEMBL374970              | CCCCC(=O)C(=O)C(=O)C2=CCCC2              | 760     |      | -10.35715 | 75.11638  | 1404.29163 | 2.39885    | 64.56504  | 2.83148   |         |
| Tranino | CHEMBL480809              | Fc1ccc(NC(=O)C(=O)C)cc1                  | 63.34   |      | -7.58511  | 68.97841  | 1000.86897 | 1.2024     | 69.04085  | 2.03073   |         |
| Tranino | CHEMBL394806              | O=C(N)C(=O)C(=O)C(=O)C2=CCCC2            | 1000    |      | -9.50351  | 74.85337  | 1392.42779 | 1.07413    | 63.55685  | 0         |         |
| Tranino | CHEMBL398900              | O=C(N)C(=O)C(=O)C(=O)C2=CCCC2            | 1750    |      | -7.92988  | 44.68778  | 969.188773 | 1.03349    | 35.91073  | 2.21782   |         |
| Tranino | 5-NITROQUINONE            | O=C1C=CC(=O)C=C1                         | 10000   |      | -8.98931  | 42.62993  | 764.89994  | 1.04356    | 23.7442   | 2.74282   |         |
| Tranino | CHEMBL333636              | Cc1ccc(NC(=O)C(=O)C)cc1                  | 10000   |      | -7.54443  | 54.87819  | 803.98117  | 1.03586    | 50.6784   | 1.30957   |         |
| Tranino | CHEMBL395018              | Fc1ccc(NC(=O)C(=O)C)cc1                  | 34.7    |      | -5.8637   | 74.24844  | 1276.44123 | 0.7217     | 70.56044  | 0.30052   |         |
| Tranino | CHEMBL192625              | Cc1ccc(NC(=O)C(=O)C)cc1                  | 534.51  |      | -9.1261   | 95.37628  | 1163.14344 | 1.36945    | 72.82192  | 2.00994   |         |
| Tranino | CHEMBL449675              | CCCCC(=O)C(=O)C(=O)C2=CCCC2              | 166.15  |      | -6.51267  | 62.51928  | 942.9431   | 1.91554    | 44.40388  | 1.15994   |         |
| Tranino | CHEMBL192039              | O=C(N)C(=O)C(=O)C(=O)C2=CCCC2            | 10000   |      | -8.13498  | 72.68463  | 1289.80082 | 1.56429    | 48.28886  | 1.90819   |         |
| Tranino | CHEMBL483676              | Fc1ccc(NC(=O)C(=O)C)cc1                  | 10000   |      | -10.03936 | 88.50406  | 1650.30413 | 0.83819    | 70.25276  | 0.2433    |         |
| Tranino | CHEMBL487102              | Cc1ccc(NC(=O)C(=O)C)cc1                  | 10000   |      | -10.11857 | 106.87188 | 1746.28654 | 1.94888    | 65.08216  | 0.44487   |         |
| Tranino | CHEMBL326740              | O=C(N)C(=O)C(=O)C(=O)C2=CCCC2            | 10000   |      | -10.28984 | 90.65928  | 1740.24869 | 2.13897    | 78.50562  | 2.92227   |         |
| Tranino | CHEMBL375304              | Cc1ccc(NC(=O)C(=O)C)cc1                  | 4380    |      | -8.93315  | 79.58882  | 1371.89154 | 2.33123    | 70.7592   | 1.95778   |         |
| Tranino | CHEMBL464002              | CCCCCCCCC(S)C(=O)C(=O)C(=O)C(=O)C2=CCCC2 | 2624.29 |      | -7.09813  | 79.52837  | 1281.61814 | 1.77009    | 68        |           |         |

**Table S2: List of drugs predicted as active with the MLP model**

| ligand ID | Basename | Score  | Gauss1 | Gauss2  | Repulsion | Hydrophobic | Hydrogen | GenericName             | MLP_prediction |
|-----------|----------|--------|--------|---------|-----------|-------------|----------|-------------------------|----------------|
| 260       | DB00425  | -10,51 | 77,16  | 1391,39 | 0,66      | 67,56       | 0,01     | Zolpidem                | 0,015209675    |
| 212       | DB00366  | -10,09 | 71,07  | 1204,98 | 0,54      | 68,17       | 0,00     | Doxylamine              | 0,018482715    |
| 531       | DB00758  | -10,30 | 75,64  | 1255,61 | 0,65      | 60,32       | 0,14     | Clopidogrel             | 0,018669128    |
| 439       | DB00645  | -10,39 | 74,46  | 1297,43 | 0,72      | 63,41       | 0,07     | Dyclonine               | 0,019448757    |
| 259       | DB00424  | -9,85  | 75,04  | 1276,02 | 0,80      | 60,05       | 0,51     | Hyoscyamine             | 0,020001113    |
| 641       | DB00889  | -10,68 | 74,85  | 1405,22 | 0,78      | 56,74       | 0,12     | Granisetron             | 0,020923913    |
| 379       | DB00572  | -10,14 | 73,97  | 1302,85 | 0,88      | 60,97       | 0,56     | Atropine                | 0,021516668    |
| 521       | DB00748  | -9,80  | 71,37  | 1220,44 | 0,70      | 60,30       | 0,03     | Carbinoxamine           | 0,021750808    |
| 5554      | DB08800  | -10,21 | 67,33  | 1215,97 | 0,52      | 56,44       | 0,00     | Chloropyramine          | 0,021885276    |
| 530       | DB00757  | -10,47 | 80,59  | 1477,67 | 0,75      | 57,30       | 0,75     | Dolasetron              | 0,022793025    |
| 1005      | DB01382  | -10,28 | 71,30  | 1301,28 | 0,50      | 37,50       | 0,22     | Glycodiazine            | 0,023188293    |
| 407       | DB00608  | -10,77 | 81,83  | 1340,52 | 0,68      | 61,19       | 0,00     | Chloroquine             | 0,023351759    |
| 715       | DB00979  | -9,80  | 68,90  | 1285,82 | 0,80      | 61,58       | 0,65     | Cyclopentolate          | 0,02349639     |
| 905       | DB01205  | -9,90  | 75,50  | 1340,64 | 0,61      | 34,61       | 0,31     | Flumazenil              | 0,023601592    |
| 68        | DB00196  | -10,30 | 77,19  | 1373,05 | 0,81      | 47,32       | 0,17     | Fluconazole             | 0,023849726    |
| 264       | DB00429  | -10,75 | 91,77  | 1612,03 | 3,96      | 67,15       | 0,94     | Carboprost Tromethamine | 0,023890376    |
| 183       | DB00334  | -10,45 | 72,38  | 1328,49 | 0,56      | 42,62       | 0,00     | Olanzapine              | 0,024311751    |
| 728       | DB00993  | -8,62  | 63,02  | 1194,93 | 0,95      | 0,00        | 1,74     | Azathioprine            | 0,024837106    |
| 181       | DB00332  | -10,89 | 81,85  | 1477,30 | 0,83      | 62,75       | 0,22     | Ipratropium bromide     | 0,024902225    |
| 70        | DB00198  | -10,11 | 70,77  | 1318,56 | 0,84      | 49,73       | 0,59     | Oseltamivir             | 0,02493745     |
| 444       | DB00651  | -8,31  | 67,16  | 1147,17 | 1,03      | 0,00        | 1,48     | Dyphylline              | 0,025066495    |
| 561       | DB00792  | -9,98  | 68,13  | 1146,72 | 0,52      | 59,31       | 0,00     | Tripelennamine          | 0,025817573    |
| 791       | DB01069  | -10,22 | 73,01  | 1195,53 | 0,57      | 55,12       | 0,00     | Promethazine            | 0,027144492    |
| 739       | DB01006  | -10,75 | 81,64  | 1321,02 | 0,71      | 64,56       | 0,00     | Letrozole               | 0,027419925    |
| 520       | DB00747  | -9,92  | 75,06  | 1341,11 | 0,86      | 45,02       | 0,59     | Scopolamine             | 0,028185934    |
| 1152      | DB01618  | -10,27 | 72,05  | 1210,32 | 0,61      | 52,79       | 0,23     | Molindone               | 0,02865082     |
| 793       | DB01071  | -10,93 | 71,67  | 1386,02 | 0,83      | 73,21       | 0,00     | Mequitazine             | 0,028692693    |
| 434       | DB00640  | -8,65  | 72,40  | 1165,19 | 1,08      | 0,00        | 1,65     | Adenosine               | 0,028808236    |
| 767       | DB01042  | -9,54  | 68,03  | 1158,22 | 0,61      | 37,67       | 0,58     | Melphalan               | 0,028875798    |
| 283       | DB00454  | -9,72  | 69,66  | 1073,14 | 0,47      | 59,01       | 0,06     | Meperidine              | 0,028987676    |
| 668       | DB00922  | -10,45 | 74,27  | 1293,60 | 0,64      | 46,85       | 0,05     | Levosimendan            | 0,029135823    |
| 466       | DB00679  | -11,28 | 82,14  | 1477,00 | 0,70      | 56,79       | 0,00     | Thioridazine            | 0,029509753    |
| 457       | DB00669  | -9,94  | 75,11  | 1248,88 | 0,56      | 34,12       | 0,17     | Sumatriptan             | 0,029818773    |
| 102       | DB00238  | -9,87  | 67,16  | 1224,87 | 0,68      | 42,93       | 0,39     | Nevirapine              | 0,029990375    |
| 67        | DB00193  | -10,01 | 70,12  | 1157,37 | 0,62      | 57,57       | 0,08     | Tramadol                | 0,030144274    |
| 701       | DB00963  | -10,32 | 74,04  | 1238,44 | 0,85      | 63,85       | 0,64     | Bromfenac               | 0,030560791    |
| 105       | DB00242  | -8,66  | 65,09  | 1174,21 | 0,87      | 8,36        | 1,25     | Cladribine              | 0,030963808    |
| 3888      | DB06766  | -10,85 | 78,43  | 1372,28 | 0,87      | 65,40       | 0,09     | Alcaftadine             | 0,030984342    |
| 1124      | DB01580  | -9,88  | 66,60  | 1180,42 | 0,76      | 45,50       | 0,79     | Oxprenolol              | 0,03125897     |
| 302       | DB00477  | -10,41 | 76,07  | 1252,55 | 0,65      | 50,90       | 0,00     | Chlorpromazine          | 0,031416625    |
| 1150      | DB01615  | -10,54 | 73,88  | 1386,17 | 0,92      | 53,04       | 0,50     | Aceprometazine          | 0,031738847    |
| 760       | DB01032  | -9,41  | 66,92  | 1188,49 | 0,76      | 48,22       | 0,67     | Probenecid              | 0,03186956     |
| 524       | DB00751  | -9,86  | 68,28  | 1138,79 | 0,59      | 73,86       | 0,08     | Epinastine              | 0,031937778    |
| 219       | DB00374  | -10,94 | 96,55  | 1611,53 | 2,93      | 76,42       | 0,56     | Treprostinil            | 0,032362312    |
| 735       | DB01002  | -9,71  | 66,57  | 1275,88 | 1,01      | 61,55       | 0,04     | Levobupivacaine         | 0,03265944     |
| 151       | DB00297  | -9,71  | 66,57  | 1275,88 | 1,01      | 61,55       | 0,04     | Bupivacaine             | 0,03265944     |
| 299       | DB00474  | -9,45  | 69,68  | 1190,40 | 0,70      | 51,40       | 0,29     | Methohexital            | 0,03279066     |
| 834       | DB01124  | -9,73  | 68,95  | 1127,65 | 0,70      | 52,50       | 0,36     | Tolbutamide             | 0,032902956    |
| 504       | DB00724  | -9,51  | 67,38  | 1079,78 | 0,59      | 53,31       | 0,29     | Imiquimod               | 0,033648282    |
| 706       | DB00969  | -10,80 | 71,53  | 1341,96 | 0,63      | 49,08       | 0,24     | Alosetron               | 0,03383127     |
| 5556      | DB08802  | -9,50  | 64,18  | 1237,98 | 0,59      | 38,08       | 0,00     | Isothipendyl            | 0,034156322    |
| 255       | DB00420  | -10,19 | 74,58  | 1191,96 | 0,68      | 55,98       | 0,00     | Promazine               | 0,034639418    |
| 653       | DB00904  | -10,76 | 66,79  | 1346,77 | 0,69      | 52,57       | 0,31     | Ondansetron             | 0,035060912    |
| 341       | DB00527  | -11,48 | 79,96  | 1529,46 | 0,67      | 55,06       | 0,09     | Dibucaine               | 0,0351758      |
| 970       | DB01297  | -9,31  | 70,72  | 1186,03 | 0,68      | 37,43       | 0,81     | Practolol               | 0,035223037    |
| 693       | DB00953  | -10,17 | 78,67  | 1195,07 | 0,68      | 49,68       | 0,07     | Rizatriptan             | 0,035530716    |
| 384       | DB00579  | -10,28 | 76,18  | 1200,26 | 0,76      | 73,02       | 0,11     | Mazindol                | 0,036393672    |
| 932       | DB01237  | -10,23 | 73,20  | 1191,04 | 0,72      | 75,19       | 0,06     | Bromodiphenhydramine    | 0,036459267    |
| 717       | DB00981  | -9,90  | 73,57  | 1248,31 | 0,67      | 37,88       | 0,14     | Physostigmine           | 0,036919296    |
| 108       | DB00247  | -11,13 | 82,44  | 1555,93 | 1,04      | 57,63       | 0,18     | Methysergide            | 0,037426144    |
| 125       | DB00268  | -9,55  | 71,25  | 1133,11 | 0,75      | 62,91       | 0,27     | Ropinirole              | 0,03757152     |
| 3822      | DB04843  | -11,05 | 81,33  | 1451,37 | 1,61      | 70,29       | 0,13     | Mepenzolate             | 0,037658036    |
| 1000      | DB01366  | -9,92  | 74,86  | 1299,92 | 0,99      | 44,89       | 0,67     | Procaterol              | 0,037944257    |
| 280       | DB00449  | -11,44 | 87,87  | 1509,80 | 1,22      | 64,56       | 1,06     | Dipivefrin              | 0,037974328    |
| 544       | DB00772  | -8,71  | 66,47  | 1182,90 | 0,66      | 11,32       | 0,69     | Malathion               | 0,03843364     |
| 699       | DB00961  | -9,58  | 68,90  | 1075,00 | 0,57      | 58,51       | 0,02     | Mepivacaine             | 0,038762033    |

|      |         |        |       |         |      |       |      |                     |             |
|------|---------|--------|-------|---------|------|-------|------|---------------------|-------------|
| 3818 | DB04838 | -10,34 | 70,08 | 1220,17 | 0,90 | 69,04 | 0,73 | Cyclandelate        | 0,039043576 |
| 197  | DB00349 | -10,55 | 76,01 | 1258,98 | 0,85 | 70,10 | 0,39 | Clobazam            | 0,039065927 |
| 3868 | DB06710 | -9,85  | 63,66 | 1282,20 | 1,65 | 63,59 | 0,23 | Methyltestosterone  | 0,03913513  |
| 1115 | DB01559 | -10,53 | 67,83 | 1276,34 | 0,80 | 57,89 | 0,30 | Clotiazepam         | 0,039443254 |
| 558  | DB00788 | -9,66  | 64,69 | 1066,31 | 0,67 | 60,98 | 0,48 | Naproxen            | 0,0396339   |
| 688  | DB00946 | -10,56 | 65,64 | 1285,15 | 1,01 | 68,04 | 0,11 | Phenprocoumon       | 0,040037602 |
| 121  | DB00264 | -9,57  | 67,95 | 1179,62 | 0,71 | 43,60 | 0,24 | Metoprolol          | 0,040742368 |
| 426  | DB00631 | -9,19  | 74,69 | 1207,37 | 0,88 | 8,05  | 1,31 | Clofarabine         | 0,040746182 |
| 184  | DB00335 | -9,50  | 74,06 | 1168,52 | 0,82 | 45,29 | 0,84 | Atenolol            | 0,041326433 |
| 698  | DB00960 | -9,52  | 70,71 | 1126,64 | 0,78 | 40,68 | 0,72 | Pindolol            | 0,041538864 |
| 378  | DB00571 | -9,58  | 72,71 | 1181,47 | 0,78 | 69,24 | 0,42 | Propranolol         | 0,042477638 |
| 664  | DB00918 | -10,73 | 80,06 | 1418,26 | 0,81 | 40,87 | 0,22 | Almotriptan         | 0,042690963 |
| 601  | DB00837 | -11,10 | 81,25 | 1408,19 | 0,90 | 53,60 | 0,81 | Progabide           | 0,04283285  |
| 327  | DB00508 | -11,44 | 82,86 | 1461,89 | 0,73 | 63,86 | 0,00 | Triflupromazine     | 0,0428344   |
| 806  | DB01087 | -9,30  | 74,61 | 1145,96 | 0,66 | 47,65 | 0,28 | Primaquine          | 0,042994022 |
| 636  | DB00880 | -8,44  | 63,90 | 1089,14 | 0,88 | 14,17 | 1,36 | Chlorothiazide      | 0,0432384   |
| 572  | DB00806 | -9,55  | 70,18 | 1254,69 | 0,70 | 20,62 | 0,76 | Pentoxifylline      | 0,04344067  |
| 423  | DB00628 | -11,01 | 69,58 | 1357,78 | 1,14 | 68,32 | 1,25 | Clorzepate          | 0,043861    |
| 98   | DB00234 | -11,01 | 74,84 | 1385,70 | 0,97 | 72,49 | 0,19 | Reboxetine          | 0,0440664   |
| 874  | DB01171 | -9,21  | 64,74 | 1108,89 | 0,60 | 42,38 | 0,36 | Moclobemide         | 0,044588774 |
| 744  | DB01011 | -9,55  | 71,30 | 1032,28 | 0,55 | 57,03 | 0,26 | Metyrapone          | 0,04467991  |
| 5562 | DB08808 | -9,78  | 68,50 | 1104,60 | 0,81 | 53,74 | 0,75 | Bupranolol          | 0,044706393 |
| 732  | DB00999 | -8,45  | 63,57 | 1093,27 | 0,95 | 13,55 | 1,48 | Hydrochlorothiazide | 0,04485762  |
| 591  | DB00827 | -9,27  | 68,02 | 1212,28 | 0,86 | 19,07 | 1,12 | Cinoxacin           | 0,045307696 |
| 914  | DB01214 | -10,74 | 71,27 | 1338,18 | 0,76 | 48,19 | 0,43 | Metipranolol        | 0,046020985 |
| 971  | DB01299 | -9,95  | 70,67 | 1312,10 | 0,67 | 26,12 | 0,54 | Sulfadoxine         | 0,04651171  |
| 201  | DB00353 | -11,20 | 82,89 | 1514,25 | 0,99 | 66,00 | 0,45 | Methylergonovine    | 0,046923846 |
| 1118 | DB01567 | -10,45 | 67,72 | 1279,98 | 0,94 | 55,77 | 0,48 | Fludiazepam         | 0,047053754 |
| 215  | DB00369 | -8,67  | 68,71 | 1140,19 | 1,17 | 8,58  | 1,75 | Cidofovir           | 0,04737562  |
| 929  | DB01233 | -9,88  | 74,50 | 1236,25 | 0,85 | 32,01 | 0,77 | Metoclopramide      | 0,047665715 |
| 740  | DB01007 | -10,94 | 71,53 | 1410,47 | 0,95 | 51,90 | 0,17 | Tioconazole         | 0,047709137 |
| 3603 | DB04571 | -9,63  | 66,74 | 1045,00 | 0,63 | 65,34 | 0,17 | Trioxsalen          | 0,047802538 |
| 814  | DB01096 | -9,60  | 73,75 | 1220,32 | 1,01 | 41,15 | 1,12 | Oxamniquine         | 0,04852119  |
| 146  | DB00291 | -10,14 | 70,10 | 1166,46 | 0,89 | 58,52 | 0,57 | Chlorambucil        | 0,048961222 |
| 316  | DB00495 | -9,09  | 72,70 | 1161,85 | 0,89 | 14,70 | 1,27 | Zidovudine          | 0,04904008  |
| 1126 | DB01582 | -9,36  | 66,93 | 1179,28 | 0,68 | 36,40 | 0,34 | Sulfamethazine      | 0,04912597  |
| 411  | DB00612 | -10,45 | 84,08 | 1405,06 | 1,07 | 43,94 | 0,30 | Bisoprolol          | 0,049145907 |
| 153  | DB00299 | -8,77  | 63,87 | 1134,68 | 0,88 | 12,28 | 1,63 | Penciclovir         | 0,04916385  |
| 543  | DB00771 | -10,90 | 81,24 | 1569,10 | 1,16 | 79,60 | 0,02 | Clidinium           | 0,04917726  |
| 673  | DB00927 | -9,34  | 74,02 | 1247,10 | 0,99 | 10,06 | 1,29 | Famotidine          | 0,049295127 |
| 3893 | DB06803 | -10,29 | 76,08 | 1304,49 | 1,20 | 47,49 | 1,35 | Nicosamide          | 0,049693078 |
| 780  | DB01058 | -11,09 | 76,19 | 1422,62 | 1,00 | 80,56 | 0,61 | Praziquantel        | 0,0500409   |
| 540  | DB00768 | -11,49 | 80,28 | 1515,71 | 1,00 | 74,01 | 0,70 | Olopatadine         | 0,05020711  |
| 610  | DB00849 | -9,60  | 73,25 | 1118,38 | 0,84 | 48,75 | 0,37 | Methylphenobarbital | 0,050239056 |
| 333  | DB00518 | -8,98  | 66,67 | 1131,95 | 0,56 | 29,40 | 0,36 | Albendazole         | 0,050257474 |
| 655  | DB00908 | -10,05 | 78,16 | 1447,79 | 0,93 | 55,09 | 0,71 | Quinidine           | 0,05030662  |
| 737  | DB01004 | -8,28  | 71,74 | 1088,44 | 1,18 | 0,00  | 1,89 | Ganciclovir         | 0,051116765 |
| 559  | DB00790 | -11,68 | 86,18 | 1589,38 | 1,52 | 57,59 | 1,78 | Perindopril         | 0,052018374 |
| 173  | DB00322 | -8,28  | 72,75 | 1061,47 | 0,97 | 7,91  | 1,29 | Floxuridine         | 0,052619845 |
| 364  | DB00552 | -8,44  | 72,65 | 1192,60 | 1,08 | 3,35  | 1,68 | Pentostatin         | 0,052815408 |
| 453  | DB00664 | -9,09  | 71,88 | 1158,90 | 0,66 | 24,43 | 0,44 | Sulfametopyrazine   | 0,052829117 |
| 154  | DB00300 | -8,99  | 77,10 | 1189,09 | 1,23 | 8,58  | 1,44 | Tenofovir           | 0,053086877 |
| 790  | DB01068 | -10,46 | 72,60 | 1365,79 | 1,12 | 49,85 | 1,09 | Clonazepam          | 0,053309977 |
| 95   | DB00231 | -10,70 | 76,93 | 1266,15 | 1,05 | 70,17 | 0,82 | Temazepam           | 0,0533475   |
| 262  | DB00427 | -10,69 | 78,54 | 1246,44 | 0,76 | 78,09 | 0,00 | Triprolidine        | 0,053792864 |
| 137  | DB00281 | -9,29  | 67,72 | 1015,12 | 0,50 | 58,27 | 0,03 | Lidocaine           | 0,05387029  |
| 3829 | DB04878 | -8,72  | 68,97 | 1165,45 | 1,32 | 4,76  | 2,04 | Voglibose           | 0,05435267  |
| 915  | DB01215 | -11,08 | 72,29 | 1280,91 | 0,55 | 67,49 | 0,00 | Estazolam           | 0,054531813 |
| 80   | DB00211 | -8,98  | 66,98 | 1142,07 | 0,95 | 18,82 | 1,45 | Midodrine           | 0,05517006  |
| 940  | DB01246 | -10,77 | 78,25 | 1245,20 | 0,70 | 61,50 | 0,00 | Trimeprazine        | 0,05555013  |
| 839  | DB01131 | -8,81  | 63,05 | 1054,80 | 0,48 | 36,81 | 0,41 | Proguanil           | 0,055686772 |
| 605  | DB00842 | -10,13 | 73,44 | 1242,26 | 1,33 | 67,88 | 0,75 | Oxazepam            | 0,055726975 |
| 386  | DB00582 | -11,27 | 87,17 | 1502,04 | 0,94 | 50,05 | 0,20 | Voriconazole        | 0,055819005 |
| 603  | DB00839 | -10,91 | 77,37 | 1295,48 | 0,71 | 54,60 | 0,28 | Tolazamide          | 0,056167364 |
| 110  | DB00249 | -8,11  | 66,44 | 1034,98 | 0,86 | 10,12 | 1,32 | Idoxuridine         | 0,056531876 |
| 754  | DB01024 | -10,78 | 77,75 | 1416,01 | 1,17 | 52,42 | 1,10 | Mycophenolic acid   | 0,057125837 |
| 773  | DB01048 | -10,43 | 74,67 | 1301,97 | 0,87 | 39,27 | 0,70 | Abacavir            | 0,057296097 |
| 320  | DB00499 | -10,16 | 69,59 | 1181,31 | 0,93 | 49,72 | 1,06 | Flutamide           | 0,057313085 |
| 939  | DB01245 | -9,10  | 65,58 | 1088,03 | 0,51 | 45,17 | 0,00 | Decamethonium       | 0,057662606 |

|      |         |        |       |         |      |       |      |                         |             |
|------|---------|--------|-------|---------|------|-------|------|-------------------------|-------------|
| 1125 | DB01581 | -9,05  | 65,91 | 1134,77 | 1,00 | 28,05 | 1,21 | Sulfamerazine           | 0,05823803  |
| 238  | DB00400 | -11,02 | 77,34 | 1434,03 | 0,74 | 39,10 | 0,20 | Griseofulvin            | 0,058549643 |
| 64   | DB00187 | -10,55 | 73,80 | 1300,82 | 0,93 | 48,25 | 0,52 | Esmolol                 | 0,05873984  |
| 128  | DB00271 | -9,39  | 60,82 | 1224,73 | 0,85 | 32,63 | 0,83 | Diatrizoate             | 0,05946359  |
| 166  | DB00315 | -10,47 | 79,00 | 1277,91 | 0,90 | 46,00 | 0,36 | Zolmitriptan            | 0,05972156  |
| 861  | DB01154 | -9,05  | 65,03 | 1056,08 | 0,52 | 46,51 | 0,17 | Thiamylal               | 0,060121328 |
| 573  | DB00807 | -10,50 | 76,19 | 1288,96 | 0,85 | 40,66 | 0,74 | Proparacaine            | 0,060261846 |
| 495  | DB00712 | -9,79  | 70,05 | 1089,97 | 0,74 | 75,43 | 0,39 | Flurbiprofen            | 0,06030169  |
| 642  | DB00891 | -9,07  | 70,90 | 1050,76 | 0,57 | 40,61 | 0,31 | Sulfapyridine           | 0,060728878 |
| 244  | DB00408 | -11,44 | 79,75 | 1383,92 | 0,62 | 56,47 | 0,00 | Loxapine                | 0,060879707 |
| 298  | DB00473 | -10,58 | 71,83 | 1152,02 | 0,55 | 70,76 | 0,11 | Hexylcaine              | 0,061187804 |
| 977  | DB01325 | -9,37  | 68,86 | 1141,67 | 0,92 | 31,07 | 1,23 | Quinethazone            | 0,06139779  |
| 77   | DB00208 | -9,16  | 64,25 | 1026,44 | 0,49 | 56,63 | 0,00 | Ticlopidine             | 0,061486483 |
| 954  | DB01262 | -7,80  | 68,44 | 1007,58 | 0,83 | 4,17  | 1,23 | Decitabine              | 0,06150651  |
| 72   | DB00202 | -8,74  | 68,52 | 1254,83 | 0,81 | 8,15  | 0,39 | Succinylcholine         | 0,06178692  |
| 827  | DB01114 | -9,37  | 65,02 | 1150,92 | 0,88 | 66,52 | 0,00 | Chlorpheniramine        | 0,062013686 |
| 505  | DB00725 | -11,04 | 75,10 | 1336,64 | 0,74 | 52,02 | 0,46 | Homatropine Methylbromi | 0,06227541  |
| 1135 | DB01598 | -8,95  | 75,22 | 1244,22 | 0,99 | 15,66 | 1,13 | Imipenem                | 0,062295288 |
| 683  | DB00939 | -10,25 | 73,11 | 1134,21 | 0,79 | 61,71 | 0,51 | Meclofenamic acid       | 0,062808335 |
| 941  | DB01247 | -8,99  | 61,70 | 1047,97 | 0,60 | 47,35 | 0,40 | Isocarboxazid           | 0,0631845   |
| 621  | DB00863 | -9,86  | 75,50 | 1299,56 | 0,89 | 18,57 | 0,97 | Ranitidine              | 0,06337488  |
| 1034 | DB01426 | -11,27 | 76,89 | 1461,23 | 0,96 | 61,54 | 0,52 | Ajmaline                | 0,06357095  |
| 150  | DB00296 | -10,63 | 74,19 | 1185,53 | 0,67 | 69,16 | 0,01 | Ropivacaine             | 0,06376156  |
| 326  | DB00507 | -10,01 | 68,78 | 1287,78 | 1,07 | 37,88 | 1,83 | Nitazoxanide            | 0,06380239  |
| 336  | DB00521 | -10,83 | 75,54 | 1304,91 | 0,80 | 49,58 | 0,60 | Carteolol               | 0,06393218  |
| 639  | DB00885 | -8,94  | 66,89 | 1059,01 | 0,61 | 38,49 | 0,44 | Pemirolast              | 0,06431523  |
| 374  | DB00564 | -10,11 | 73,71 | 1058,06 | 0,56 | 70,35 | 0,06 | Carbamazepine           | 0,06447044  |
| 557  | DB00787 | -7,62  | 68,14 | 1030,57 | 1,01 | 0,00  | 1,25 | Aciclovir               | 0,06448388  |
| 734  | DB01001 | -9,22  | 65,88 | 1052,64 | 0,84 | 45,35 | 0,96 | Salbutamol              | 0,06455535  |
| 947  | DB01253 | -11,56 | 83,84 | 1435,40 | 0,89 | 65,11 | 0,55 | Ergonovine              | 0,064644635 |
| 866  | DB01161 | -9,20  | 70,45 | 1116,22 | 0,74 | 37,45 | 0,41 | Chloroprocaine          | 0,064646274 |
| 1133 | DB01595 | -9,94  | 71,85 | 1324,47 | 1,38 | 48,41 | 1,02 | Nitrazepam              | 0,066090256 |
| 579  | DB00814 | -10,50 | 74,13 | 1417,21 | 0,94 | 38,06 | 1,07 | Meloxicam               | 0,0662159   |
| 1154 | DB01620 | -9,73  | 69,13 | 1065,53 | 0,78 | 69,42 | 0,00 | Pheniramine             | 0,066239655 |
| 74   | DB00205 | -9,46  | 70,08 | 1082,29 | 0,89 | 56,51 | 0,26 | Pyrimethamine           | 0,06665817  |
| 784  | DB01062 | -11,70 | 85,53 | 1578,25 | 0,95 | 76,18 | 0,04 | Oxybutynin              | 0,06688303  |
| 518  | DB00745 | -10,38 | 71,90 | 1167,12 | 1,10 | 74,26 | 1,13 | Modafinil               | 0,067065775 |
| 1031 | DB01423 | -8,41  | 63,24 | 1065,67 | 0,94 | 13,87 | 1,66 | Stepronin               | 0,06748256  |
| 216  | DB00370 | -10,83 | 75,76 | 1196,10 | 0,56 | 69,56 | 0,01 | Mirtazapine             | 0,06766501  |
| 152  | DB00298 | -11,86 | 77,03 | 1485,04 | 0,62 | 56,63 | 0,00 | Dapiprazole             | 0,067690164 |
| 279  | DB00446 | -10,14 | 71,55 | 1255,19 | 1,48 | 40,10 | 2,15 | Chloramphenicol         | 0,06779027  |
| 998  | DB01359 | -11,07 | 77,89 | 1269,38 | 0,69 | 82,16 | 0,16 | Penbutolol              | 0,06787479  |
| 651  | DB00902 | -10,87 | 79,50 | 1254,06 | 0,74 | 62,68 | 0,00 | Methdilazine            | 0,06830013  |
| 934  | DB01239 | -10,65 | 79,14 | 1234,28 | 0,87 | 80,47 | 0,00 | Chlorprothixene         | 0,0685513   |
| 3863 | DB06701 | -9,25  | 67,79 | 1008,57 | 0,53 | 63,74 | 0,23 | Dexmethylphenidate      | 0,06867537  |
| 257  | DB00422 | -9,25  | 67,79 | 1008,57 | 0,53 | 63,74 | 0,23 | Methylphenidate         | 0,06867537  |
| 220  | DB00377 | -11,14 | 72,13 | 1323,28 | 0,72 | 83,25 | 0,16 | Palonosetron            | 0,068783015 |
| 5553 | DB08799 | -10,75 | 72,74 | 1199,43 | 0,64 | 71,63 | 0,00 | Antazoline              | 0,06939915  |
| 957  | DB01265 | -8,39  | 68,39 | 1038,50 | 0,80 | 15,05 | 1,27 | Telbivudine             | 0,06949189  |
| 671  | DB00925 | -11,01 | 71,16 | 1266,45 | 0,68 | 71,67 | 0,00 | Phenoxybenzamine        | 0,07009825  |
| 731  | DB00998 | -9,28  | 72,21 | 1108,76 | 0,84 | 49,19 | 0,89 | Frovatriptan            | 0,07100481  |
| 1018 | DB01407 | -9,02  | 67,26 | 1042,72 | 0,63 | 45,08 | 0,34 | Clenbuterol             | 0,07106486  |
| 3830 | DB04880 | -9,12  | 69,28 | 1076,09 | 0,83 | 34,74 | 1,00 | Enoximone               | 0,071314335 |
| 593  | DB00829 | -10,71 | 73,12 | 1187,89 | 0,66 | 68,50 | 0,23 | Diazepam                | 0,071484864 |
| 196  | DB00348 | -11,31 | 80,74 | 1422,17 | 1,64 | 52,98 | 2,21 | Nitisonone              | 0,071513355 |
| 225  | DB00384 | -9,17  | 70,48 | 1176,51 | 0,97 | 40,74 | 0,88 | Triamterene             | 0,07161993  |
| 358  | DB00546 | -11,83 | 79,63 | 1499,73 | 0,72 | 73,10 | 0,00 | Adinazolam              | 0,07231593  |
| 995  | DB01354 | -9,95  | 78,97 | 1157,55 | 1,07 | 53,77 | 0,32 | Heptabarbital           | 0,07241717  |
| 425  | DB00630 | -7,96  | 74,31 | 1039,24 | 1,32 | 0,00  | 1,82 | Alendronate             | 0,07401624  |
| 3869 | DB06711 | -9,48  | 63,26 | 968,34  | 0,40 | 73,47 | 0,00 | Naphazoline             | 0,074202746 |
| 300  | DB00475 | -10,88 | 76,34 | 1284,55 | 0,85 | 60,35 | 0,24 | Chlordiazepoxide        | 0,074967235 |
| 695  | DB00956 | -11,11 | 83,82 | 1336,66 | 1,08 | 68,80 | 0,65 | Hydrocodone             | 0,076345086 |
| 187  | DB00338 | -11,14 | 72,81 | 1483,65 | 0,62 | 33,14 | 0,43 | Omeprazole              | 0,07654762  |
| 511  | DB00736 | -11,14 | 72,81 | 1483,65 | 0,62 | 33,14 | 0,43 | Esomeprazole            | 0,07654762  |
| 309  | DB00487 | -10,32 | 73,85 | 1450,44 | 0,81 | 30,01 | 0,77 | Pefloxacin              | 0,07689339  |
| 355  | DB00543 | -11,17 | 79,80 | 1314,27 | 0,73 | 61,96 | 0,00 | Amoxapine               | 0,07713193  |
| 304  | DB00480 | -9,81  | 75,13 | 1145,99 | 0,99 | 40,47 | 1,09 | Lenalidomide            | 0,07713422  |
| 575  | DB00809 | -11,03 | 78,89 | 1268,74 | 0,71 | 60,11 | 0,29 | Tropicamide             | 0,07713497  |
| 529  | DB00756 | -10,81 | 71,75 | 1287,00 | 0,94 | 53,53 | 0,91 | Hexachlorophene         | 0,077397436 |



|      |         |        |       |         |      |        |      |                           |             |
|------|---------|--------|-------|---------|------|--------|------|---------------------------|-------------|
| 289  | DB00461 | -9,95  | 67,71 | 1040,88 | 0,66 | 74,65  | 0,18 | Nabumetone                | 0,077774286 |
| 547  | DB00776 | -10,29 | 76,91 | 1170,38 | 1,03 | 56,79  | 0,67 | Oxcarbazepine             | 0,07782602  |
| 1923 | DB02546 | -10,44 | 72,60 | 1184,39 | 0,95 | 57,15  | 0,92 | Vorinostat                | 0,07855189  |
| 733  | DB01000 | -10,70 | 75,06 | 1410,69 | 1,09 | 37,28  | 1,70 | Cyclacillin               | 0,07886514  |
| 833  | DB01123 | -9,06  | 65,32 | 978,42  | 0,50 | 57,32  | 0,17 | Proflavine                | 0,079057574 |
| 585  | DB00821 | -10,43 | 73,03 | 1172,50 | 0,94 | 62,38  | 0,65 | Carprofen                 | 0,07937583  |
| 274  | DB00440 | -9,66  | 64,93 | 1306,35 | 0,83 | 24,26  | 0,78 | Trimethoprim              | 0,07955256  |
| 1149 | DB01614 | -11,27 | 74,25 | 1389,16 | 0,77 | 51,54  | 0,52 | Acepromazine              | 0,07964867  |
| 550  | DB00779 | -8,86  | 60,63 | 1074,97 | 0,96 | 31,31  | 1,47 | Nalidixic Acid            | 0,08057326  |
| 141  | DB00286 | -12,70 | 83,19 | 1502,10 | 1,30 | 86,53  | 1,36 | Conjugated Estrogens      | 0,080595195 |
| 1143 | DB01608 | -11,76 | 86,53 | 1544,12 | 0,92 | 59,75  | 0,15 | Propericiazine            | 0,080673695 |
| 1019 | DB01408 | -10,78 | 81,40 | 1590,90 | 0,90 | 41,52  | 0,36 | Bambuterol                | 0,080685854 |
| 963  | DB01280 | -9,40  | 68,93 | 1301,76 | 1,06 | 0,00   | 1,92 | Nelarabine                | 0,08075315  |
| 678  | DB00933 | -11,77 | 77,43 | 1570,85 | 0,82 | 58,96  | 0,38 | Mesoridazine              | 0,08109039  |
| 462  | DB00674 | -10,95 | 81,53 | 1264,23 | 0,76 | 54,75  | 0,41 | Galantamine               | 0,08109531  |
| 158  | DB00306 | -9,09  | 67,31 | 1121,11 | 0,80 | 38,99  | 0,38 | Talbutal                  | 0,0815922   |
| 1020 | DB01409 | -10,84 | 84,62 | 1585,92 | 0,85 | 38,57  | 0,48 | Tiotropium                | 0,0817067   |
| 3843 | DB05271 | -11,11 | 71,70 | 1341,38 | 0,95 | 65,53  | 0,26 | Rotigotine Transdermal Pa | 0,08285329  |
| 322  | DB00501 | -7,68  | 66,02 | 1060,55 | 0,42 | 6,31   | 0,00 | Cimetidine                | 0,08312982  |
| 1014 | DB01399 | -10,34 | 71,98 | 1188,70 | 1,29 | 52,78  | 1,51 | Salsalate                 | 0,08323324  |
| 996  | DB01355 | -9,25  | 73,11 | 1046,58 | 0,81 | 50,06  | 0,31 | Hexobarbital              | 0,08333406  |
| 389  | DB00586 | -10,27 | 75,53 | 1133,50 | 0,95 | 61,75  | 0,63 | Diclofenac                | 0,08383277  |
| 169  | DB00318 | -11,11 | 85,83 | 1321,55 | 1,14 | 69,27  | 0,71 | Codeine                   | 0,08417073  |
| 245  | DB00409 | -10,51 | 66,40 | 1362,58 | 0,94 | 37,60  | 1,00 | Remoxipride               | 0,08497962  |
| 545  | DB00774 | -9,80  | 77,52 | 1273,61 | 1,10 | 18,12  | 1,30 | Hydroflumethiazide        | 0,0852679   |
| 1146 | DB01611 | -11,17 | 79,55 | 1402,17 | 0,92 | 48,97  | 0,27 | Hydroxychloroquine        | 0,08534214  |
| 206  | DB00359 | -8,64  | 69,32 | 1057,73 | 0,61 | 29,35  | 0,34 | Sulfadiazine              | 0,085657924 |
| 763  | DB01035 | -8,86  | 67,90 | 1061,78 | 0,73 | 36,70  | 0,50 | Procainamide              | 0,0860866   |
| 946  | DB01252 | -11,95 | 82,87 | 1411,27 | 1,05 | 80,83  | 0,81 | Mitiglinide               | 0,08725187  |
| 626  | DB00870 | -9,08  | 65,19 | 1115,87 | 0,76 | 58,07  | 0,42 | Suprofen                  | 0,08799219  |
| 910  | DB01210 | -11,16 | 74,61 | 1290,98 | 0,73 | 64,55  | 0,34 | Levobunolol               | 0,0881176   |
| 268  | DB00434 | -11,06 | 79,06 | 1309,28 | 1,71 | 102,12 | 0,00 | Cyproheptadine            | 0,08967477  |
| 276  | DB00442 | -9,67  | 69,72 | 1234,03 | 1,08 | 21,61  | 1,65 | Entecavir                 | 0,0901545   |
| 1036 | DB01428 | -9,15  | 65,70 | 1052,50 | 0,81 | 62,83  | 0,68 | Oxybenzone                | 0,09030789  |
| 599  | DB00835 | -9,23  | 65,07 | 1143,56 | 0,90 | 65,94  | 0,00 | Brompheniramine           | 0,09046522  |
| 242  | DB00405 | -9,23  | 65,07 | 1143,56 | 0,90 | 65,94  | 0,00 | Dexbrompheniramine        | 0,09046522  |
| 684  | DB00940 | -11,67 | 78,09 | 1521,16 | 0,98 | 66,57  | 0,38 | Methantheline             | 0,09073743  |
| 431  | DB00636 | -8,83  | 63,32 | 1013,92 | 0,64 | 46,05  | 0,48 | Clofibrate                | 0,09100363  |
| 294  | DB00469 | -9,83  | 71,65 | 1366,13 | 0,92 | 15,82  | 1,37 | Tenoxicam                 | 0,09104824  |
| 3857 | DB06694 | -10,35 | 68,78 | 1087,18 | 0,59 | 79,64  | 0,00 | Xylometazoline            | 0,091106534 |
| 3833 | DB04896 | -10,27 | 70,30 | 1073,75 | 0,63 | 77,08  | 0,11 | Milnacipran               | 0,0912565   |
| 812  | DB01094 | -11,12 | 74,88 | 1355,29 | 0,90 | 47,41  | 0,96 | Hesperetin                | 0,092532605 |
| 3854 | DB06335 | -11,56 | 87,32 | 1411,73 | 1,01 | 68,23  | 0,51 | Saxagliptin               | 0,09277192  |
| 301  | DB00476 | -10,87 | 72,59 | 1252,63 | 0,91 | 72,00  | 0,12 | Duloxetine                | 0,09302679  |
| 503  | DB00721 | -8,89  | 69,66 | 1063,75 | 0,80 | 36,58  | 0,55 | Procaine                  | 0,093780726 |
| 809  | DB01090 | -8,81  | 65,97 | 1046,00 | 0,50 | 42,50  | 0,00 | Pentolinium               | 0,094213486 |
| 5560 | DB08806 | -12,08 | 88,95 | 1495,99 | 1,03 | 66,79  | 0,74 | Roxatidine acetate        | 0,0944497   |
| 421  | DB00625 | -11,16 | 75,79 | 1270,86 | 0,71 | 77,81  | 0,13 | Efavirenz                 | 0,094852775 |
| 437  | DB00643 | -11,49 | 71,82 | 1351,71 | 0,68 | 66,52  | 0,35 | Mebendazole               | 0,0951744   |
| 388  | DB00585 | -9,31  | 72,60 | 1293,58 | 1,48 | 0,00   | 2,22 | Nizatidine                | 0,09520924  |
| 556  | DB00786 | -10,72 | 71,18 | 1399,14 | 1,66 | 36,40  | 2,92 | Marimastat                | 0,09585503  |
| 3862 | DB06700 | -10,64 | 72,97 | 1128,34 | 0,60 | 74,80  | 0,19 | Desvenlafaxine            | 0,096007705 |
| 876  | DB01173 | -10,97 | 73,25 | 1201,33 | 0,58 | 75,89  | 0,00 | Orphenadrine              | 0,09617111  |
| 859  | DB01151 | -10,65 | 68,06 | 1211,17 | 0,94 | 72,01  | 0,42 | Desipramine               | 0,09707123  |
| 3873 | DB06716 | -10,95 | 71,88 | 1265,75 | 0,92 | 63,13  | 0,73 | Fospropofol               | 0,098305225 |
| 548  | DB00777 | -11,63 | 69,23 | 1474,92 | 0,92 | 61,16  | 0,33 | Propiomazine              | 0,09831199  |
| 345  | DB00532 | -8,92  | 65,57 | 1001,53 | 0,76 | 48,07  | 0,64 | Mephenytoin               | 0,09855524  |
| 3845 | DB06148 | -10,62 | 72,37 | 1187,14 | 0,74 | 90,37  | 0,00 | Mianserin                 | 0,0988372   |
| 580  | DB00815 | -9,94  | 68,30 | 1058,86 | 1,26 | 65,21  | 1,40 | Sodium lauryl sulfate     | 0,099544466 |
| 460  | DB00672 | -9,02  | 72,21 | 1074,89 | 0,85 | 38,10  | 0,49 | Chlorpropamide            | 0,09958136  |
| 478  | DB00692 | -11,03 | 77,68 | 1250,64 | 0,76 | 66,00  | 0,25 | Phentolamine              | 0,09993857  |
| 625  | DB00869 | -9,45  | 69,33 | 1194,72 | 1,17 | 21,51  | 1,79 | Dorzolamide               | 0,10026732  |
| 700  | DB00962 | -11,37 | 84,47 | 1411,94 | 0,81 | 46,20  | 0,24 | Zaleplon                  | 0,100702405 |
| 352  | DB00540 | -9,68  | 62,26 | 1218,20 | 0,97 | 88,72  | 0,03 | Nortriptyline             | 0,100982875 |
| 267  | DB00433 | -11,93 | 84,87 | 1504,99 | 0,71 | 50,06  | 0,00 | Prochlorperazine          | 0,10311213  |
| 321  | DB00500 | -10,61 | 70,27 | 1155,40 | 0,85 | 66,74  | 0,90 | Tolmetin                  | 0,103197485 |
| 674  | DB00928 | -8,22  | 70,50 | 1061,27 | 1,22 | 0,00   | 2,15 | Azacididine               | 0,103569716 |
| 571  | DB00805 | -11,48 | 77,12 | 1341,87 | 0,69 | 65,20  | 0,19 | Minaprine                 | 0,10376716  |
| 442  | DB00649 | -8,17  | 68,53 | 1009,80 | 0,78 | 19,77  | 0,84 | Stavudine                 | 0,10401651  |

|      |         |        |       |         |      |       |      |                           |             |
|------|---------|--------|-------|---------|------|-------|------|---------------------------|-------------|
| 835  | DB01125 | -10,66 | 72,58 | 1150,79 | 0,71 | 75,57 | 0,16 | Anisindione               | 0,10406667  |
| 1043 | DB01437 | -10,04 | 82,20 | 1150,46 | 1,90 | 73,59 | 0,34 | Glutethimide              | 0,104266346 |
| 724  | DB00989 | -8,63  | 66,06 | 1099,83 | 0,52 | 36,52 | 0,17 | Rivastigmine              | 0,10448161  |
| 163  | DB00311 | -8,40  | 70,59 | 1037,34 | 0,98 | 22,08 | 1,01 | Ethoxzolamide             | 0,10559967  |
| 863  | DB01156 | -9,15  | 67,73 | 952,28  | 0,56 | 63,65 | 0,12 | Bupropion                 | 0,10607886  |
| 795  | DB01075 | -10,35 | 67,91 | 1130,43 | 0,85 | 85,91 | 0,04 | Diphenhydramine           | 0,106883496 |
| 139  | DB00283 | -11,65 | 83,32 | 1442,66 | 0,98 | 78,38 | 0,00 | Clemastine                | 0,10787952  |
| 909  | DB01209 | -10,37 | 73,44 | 1090,99 | 0,74 | 77,04 | 0,09 | Dezocine                  | 0,10822168  |
| 481  | DB00695 | -9,81  | 73,74 | 1330,98 | 1,28 | 28,33 | 1,60 | Furosemide                | 0,10854611  |
| 311  | DB00489 | -8,65  | 67,28 | 1133,62 | 0,66 | 33,58 | 0,49 | Sotalol                   | 0,10895702  |
| 210  | DB00363 | -11,50 | 81,68 | 1382,85 | 0,83 | 61,35 | 0,02 | Clozapine                 | 0,10954291  |
| 400  | DB00599 | -8,74  | 62,83 | 1006,04 | 0,54 | 46,68 | 0,23 | Thiopental                | 0,11090347  |
| 340  | DB00525 | -11,59 | 70,57 | 1355,57 | 0,69 | 75,98 | 0,00 | Tolnaftate                | 0,11126369  |
| 582  | DB00817 | -11,44 | 78,19 | 1360,84 | 0,89 | 51,80 | 0,98 | Rosoxacin                 | 0,111337066 |
| 1129 | DB01588 | -11,50 | 82,28 | 1384,39 | 0,89 | 79,19 | 0,14 | Prazepam                  | 0,11158419  |
| 3585 | DB04552 | -10,76 | 74,95 | 1257,43 | 1,07 | 47,48 | 1,43 | Niflumic Acid             | 0,11165744  |
| 484  | DB00698 | -8,60  | 71,35 | 1105,74 | 1,50 | 9,10  | 2,21 | Nitrofurantoin            | 0,11242539  |
| 1032 | DB01424 | -8,66  | 64,61 | 1023,38 | 0,54 | 40,62 | 0,18 | Aminophenazone            | 0,11265743  |
| 1141 | DB01606 | -9,38  | 70,89 | 1243,07 | 1,12 | 5,86  | 2,01 | Tazobactam                | 0,112787366 |
| 881  | DB01178 | -9,29  | 67,05 | 1054,36 | 1,07 | 43,33 | 1,44 | Chlormezanone             | 0,114438266 |
| 230  | DB00391 | -10,63 | 68,65 | 1400,28 | 0,88 | 30,83 | 1,06 | Sulpiride                 | 0,11470944  |
| 936  | DB01241 | -10,47 | 71,27 | 1104,74 | 0,76 | 74,37 | 0,46 | Gemfibrozil               | 0,11531708  |
| 680  | DB00935 | -10,51 | 74,31 | 1159,37 | 0,97 | 74,25 | 0,17 | Oxymetazoline             | 0,116435945 |
| 405  | DB00606 | -10,88 | 75,26 | 1458,90 | 1,42 | 43,39 | 1,69 | Cyclothiazide             | 0,117026836 |
| 562  | DB00794 | -9,06  | 68,88 | 998,99  | 0,75 | 55,97 | 0,22 | Primidone                 | 0,11809224  |
| 328  | DB00509 | -11,20 | 90,47 | 1431,30 | 1,49 | 66,80 | 0,52 | Dextrothyroxine           | 0,11847913  |
| 903  | DB01203 | -11,24 | 74,41 | 1350,59 | 1,18 | 49,93 | 1,49 | Nadolol                   | 0,119083166 |
| 555  | DB00784 | -10,31 | 67,75 | 1080,56 | 0,81 | 76,79 | 0,53 | Mefenamic acid            | 0,1191982   |
| 566  | DB00800 | -11,00 | 74,23 | 1273,78 | 1,10 | 60,68 | 0,99 | Fenoldopam                | 0,120464236 |
| 716  | DB00980 | -10,68 | 75,66 | 1154,22 | 0,79 | 75,46 | 0,10 | Ramelteon                 | 0,12159547  |
| 567  | DB00801 | -11,92 | 83,90 | 1443,71 | 0,88 | 78,68 | 0,29 | Halazepam                 | 0,12267399  |
| 275  | DB00441 | -8,85  | 71,87 | 1112,64 | 1,15 | 12,17 | 1,87 | Gemcitabine               | 0,12318581  |
| 3827 | DB04876 | -11,61 | 80,67 | 1338,15 | 0,71 | 64,77 | 0,29 | Vildagliptin              | 0,12445077  |
| 721  | DB00986 | -11,77 | 81,64 | 1372,89 | 0,64 | 65,46 | 0,05 | Glycopyrrolate            | 0,124700636 |
| 877  | DB01174 | -8,77  | 70,55 | 1076,26 | 0,72 | 43,36 | 0,52 | Phenobarbital             | 0,12543762  |
| 867  | DB01163 | -10,85 | 71,96 | 1359,03 | 0,99 | 31,89 | 1,68 | Amdinocillin              | 0,12607366  |
| 3823 | DB04844 | -11,48 | 75,18 | 1389,67 | 0,87 | 59,75 | 0,46 | Tetrabenazine             | 0,12620988  |
| 315  | DB00494 | -10,80 | 73,66 | 1361,51 | 1,11 | 35,16 | 1,47 | Entacapone                | 0,12729695  |
| 281  | DB00451 | -11,31 | 74,25 | 1483,01 | 1,11 | 49,80 | 0,64 | Levothyroxine             | 0,1278562   |
| 826  | DB01113 | -11,49 | 80,18 | 1502,67 | 0,91 | 40,97 | 0,36 | Papaverine                | 0,12970471  |
| 722  | DB00987 | -8,41  | 70,60 | 1067,83 | 1,24 | 5,55  | 2,10 | Cytarabine                | 0,12984616  |
| 84   | DB00215 | -11,85 | 87,62 | 1435,75 | 0,83 | 76,83 | 0,04 | Citalopram                | 0,13132462  |
| 878  | DB01175 | -11,85 | 87,62 | 1435,75 | 0,83 | 76,83 | 0,04 | Escitalopram              | 0,13132462  |
| 266  | DB00432 | -10,08 | 75,86 | 1254,32 | 0,97 | 23,57 | 1,54 | Trifluridine              | 0,13142917  |
| 3887 | DB06751 | -11,68 | 92,84 | 1745,03 | 1,17 | 59,95 | 0,25 | Drotaverine               | 0,13158509  |
| 1114 | DB01558 | -8,89  | 64,59 | 1165,87 | 0,82 | 46,03 | 0,31 | Bromazepam                | 0,13183254  |
| 193  | DB00344 | -10,66 | 68,91 | 1201,51 | 0,92 | 97,00 | 0,02 | Protriptyline             | 0,13330796  |
| 1134 | DB01597 | -11,34 | 89,48 | 1455,48 | 1,51 | 51,09 | 1,34 | Cilastatin                | 0,13376221  |
| 652  | DB00903 | -9,11  | 67,06 | 1180,79 | 1,05 | 59,14 | 0,87 | Ethacrynic acid           | 0,13449883  |
| 657  | DB00911 | -8,07  | 67,54 | 1007,69 | 1,21 | 11,15 | 1,86 | Tinidazole                | 0,13615373  |
| 366  | DB00554 | -11,54 | 73,87 | 1420,76 | 1,16 | 44,07 | 1,73 | Piroxicam                 | 0,13638207  |
| 261  | DB00426 | -10,36 | 75,37 | 1405,52 | 0,96 | 16,87 | 1,09 | Famciclovir               | 0,13668123  |
| 292  | DB00464 | -10,66 | 74,80 | 1158,01 | 1,04 | 68,43 | 0,86 | Sodium Tetradecyl Sulfate | 0,13689744  |
| 253  | DB00418 | -9,25  | 73,45 | 1124,48 | 1,14 | 44,67 | 0,39 | Secobarbital              | 0,13738072  |
| 164  | DB00312 | -8,83  | 68,23 | 1013,44 | 0,84 | 45,38 | 0,50 | Pentobarbital             | 0,13878101  |
| 992  | DB01351 | -8,89  | 67,72 | 1026,26 | 0,89 | 46,94 | 0,49 | Amobarbital               | 0,13899156  |
| 896  | DB01195 | -12,60 | 91,65 | 1682,77 | 0,76 | 53,58 | 0,27 | Flecainide                | 0,1392923   |
| 623  | DB00867 | -11,26 | 76,30 | 1290,33 | 0,96 | 65,11 | 0,71 | Ritodrine                 | 0,1401195   |
| 692  | DB00952 | -11,45 | 84,47 | 1418,02 | 0,97 | 51,89 | 0,23 | Naratriptan               | 0,1409668   |
| 921  | DB01221 | -9,40  | 74,67 | 1071,06 | 1,24 | 60,73 | 0,23 | Ketamine                  | 0,14200744  |
| 872  | DB01168 | -8,56  | 61,05 | 1010,34 | 0,55 | 43,39 | 0,20 | Procarbazine              | 0,14299878  |
| 458  | DB00670 | -12,02 | 82,30 | 1558,29 | 0,68 | 39,65 | 0,40 | Pirenzepine               | 0,14316684  |
| 99   | DB00235 | -8,68  | 66,50 | 979,70  | 0,59 | 45,66 | 0,27 | Milrinone                 | 0,143453    |
| 135  | DB00279 | -11,40 | 77,62 | 1390,66 | 1,03 | 50,86 | 0,94 | Liothyronine              | 0,14464137  |
| 339  | DB00524 | -12,24 | 80,04 | 1459,68 | 0,92 | 58,54 | 1,00 | Metolazone                | 0,14656186  |
| 127  | DB00270 | -11,97 | 84,59 | 1601,63 | 0,82 | 37,50 | 0,13 | Isradipine                | 0,1494278   |
| 753  | DB01021 | -9,54  | 73,50 | 1270,91 | 1,34 | 23,67 | 2,09 | Trichlormethiazide        | 0,14979216  |
| 162  | DB00310 | -11,80 | 76,36 | 1337,92 | 1,01 | 66,49 | 1,19 | Chlorthalidone            | 0,15006778  |
| 1158 | DB01624 | -12,37 | 79,27 | 1632,92 | 1,00 | 74,81 | 0,12 | Zuclopenthixol            | 0,15072158  |

|      |         |        |       |         |      |        |      |                           |            |
|------|---------|--------|-------|---------|------|--------|------|---------------------------|------------|
| 231  | DB00392 | -11,55 | 77,84 | 1313,51 | 0,69 | 73,80  | 0,00 | Ethopropazine             | 0,15085024 |
| 250  | DB00414 | -11,69 | 78,86 | 1361,60 | 1,02 | 59,69  | 1,08 | Acetohexamide             | 0,15099299 |
| 643  | DB00892 | -11,18 | 80,49 | 1362,66 | 1,07 | 47,59  | 0,89 | Oxybuprocaine             | 0,15129268 |
| 888  | DB01186 | -11,53 | 74,36 | 1324,37 | 0,76 | 76,47  | 0,02 | Pergolide                 | 0,1537163  |
| 147  | DB00292 | -8,56  | 60,94 | 1085,76 | 0,47 | 45,99  | 0,13 | Etomidate                 | 0,15405446 |
| 234  | DB00395 | -8,69  | 69,03 | 1153,50 | 0,98 | 32,22  | 0,82 | Carisoprodol              | 0,15423062 |
| 5551 | DB08796 | -12,34 | 90,77 | 1715,07 | 1,16 | 54,24  | 0,12 | Pipazethate               | 0,1568735  |
| 1105 | DB01544 | -11,60 | 83,56 | 1355,31 | 0,84 | 60,62  | 0,37 | Flunitrazepam             | 0,1575326  |
| 944  | DB01250 | -11,06 | 77,36 | 1356,22 | 1,18 | 37,95  | 1,66 | Olsalazine                | 0,15783307 |
| 144  | DB00289 | -10,67 | 72,06 | 1112,28 | 0,71 | 83,62  | 0,06 | Atomoxetine               | 0,1592614  |
| 497  | DB00714 | -11,12 | 74,83 | 1198,18 | 0,80 | 77,22  | 0,41 | Apomorphine               | 0,15971875 |
| 254  | DB00419 | -7,90  | 63,76 | 992,80  | 1,17 | 19,15  | 1,41 | Miglustat                 | 0,1602112  |
| 522  | DB00749 | -11,11 | 69,54 | 1295,67 | 1,09 | 70,01  | 0,71 | Etodolac                  | 0,16040078 |
| 965  | DB01288 | -11,70 | 78,19 | 1357,56 | 1,16 | 59,91  | 1,35 | Fenoterol                 | 0,16215259 |
| 762  | DB01034 | -9,31  | 65,01 | 1003,50 | 1,14 | 51,49  | 1,66 | Cerulenin                 | 0,16408953 |
| 332  | DB00517 | -11,08 | 72,19 | 1278,57 | 1,05 | 71,76  | 0,48 | Anisotropine Methylbromid | 0,16454577 |
| 492  | DB00708 | -12,46 | 89,33 | 1643,26 | 1,05 | 68,85  | 0,01 | Sufentanil                | 0,16529366 |
| 967  | DB01291 | -8,28  | 63,91 | 1052,65 | 0,79 | 28,39  | 1,24 | Pirbuterol                | 0,16611165 |
| 130  | DB00273 | -10,64 | 74,46 | 1384,45 | 1,16 | 29,66  | 1,35 | Topiramate                | 0,16719466 |
| 852  | DB01144 | -9,11  | 82,70 | 1145,30 | 2,04 | 23,46  | 1,96 | Dichlorphenamide          | 0,16725576 |
| 1015 | DB01400 | -7,74  | 63,75 | 987,30  | 0,49 | 17,81  | 0,28 | Neostigmine               | 0,16787055 |
| 635  | DB00879 | -7,52  | 65,92 | 1049,72 | 1,01 | 4,19   | 0,80 | Emtricitabine             | 0,16812193 |
| 383  | DB00578 | -11,46 | 77,02 | 1596,11 | 1,34 | 40,68  | 2,02 | Carbenicillin             | 0,16890612 |
| 412  | DB00613 | -12,26 | 83,75 | 1524,82 | 0,78 | 58,51  | 0,04 | Amodiaquine               | 0,1693829  |
| 3876 | DB06725 | -10,41 | 70,87 | 1439,95 | 1,10 | 27,11  | 1,71 | Lornoxicam                | 0,16983661 |
| 491  | DB00706 | -11,39 | 95,67 | 1711,89 | 1,33 | 56,29  | 0,60 | Tamsulosin                | 0,17043266 |
| 243  | DB00406 | -12,52 | 93,44 | 1671,30 | 1,54 | 74,15  | 0,01 | Gentian Violet            | 0,17077395 |
| 454  | DB00665 | -11,18 | 77,47 | 1392,56 | 1,25 | 42,05  | 1,38 | Nilutamide                | 0,17110208 |
| 711  | DB00974 | -9,17  | 70,60 | 1240,84 | 1,40 | 3,78   | 2,61 | Edetic Acid               | 0,17167231 |
| 96   | DB00232 | -9,87  | 74,95 | 1230,46 | 1,38 | 17,85  | 2,37 | Methyclothiazide          | 0,17253649 |
| 523  | DB00750 | -8,96  | 67,63 | 1005,37 | 0,90 | 56,03  | 0,28 | Prilocaine                | 0,17324415 |
| 3841 | DB05265 | -12,58 | 81,34 | 1597,14 | 1,30 | 76,94  | 0,99 | Ecabet                    | 0,17483559 |
| 313  | DB00491 | -7,42  | 70,99 | 1022,19 | 1,52 | 0,00   | 1,53 | Miglitol                  | 0,1749506  |
| 83   | DB00214 | -11,90 | 80,32 | 1478,86 | 0,88 | 51,70  | 0,59 | Toraseamide               | 0,1759144  |
| 775  | DB01050 | -9,26  | 59,94 | 917,38  | 0,59 | 76,04  | 0,39 | Ibuprofen                 | 0,17641816 |
| 350  | DB00537 | -11,59 | 85,57 | 1459,80 | 0,89 | 39,06  | 0,67 | Ciprofloxacin             | 0,17660004 |
| 258  | DB00423 | -8,85  | 60,82 | 1067,79 | 1,07 | 26,66  | 1,95 | Methocarbamol             | 0,1773397  |
| 817  | DB01101 | -10,92 | 82,16 | 1553,71 | 1,50 | 35,87  | 2,14 | Capecitabine              | 0,18015882 |
| 382  | DB00577 | -10,30 | 76,38 | 1430,32 | 1,03 | 11,69  | 1,13 | Valaciclovir              | 0,18032718 |
| 136  | DB00280 | -12,16 | 69,92 | 1521,10 | 0,97 | 70,85  | 0,27 | Disopyramide              | 0,18043137 |
| 969  | DB01296 | -6,94  | 61,86 | 899,29  | 0,99 | 0,00   | 1,58 | Glucosamine               | 0,18173555 |
| 396  | DB00594 | -7,03  | 55,59 | 952,34  | 0,65 | 5,57   | 0,83 | Amiloride                 | 0,18317112 |
| 919  | DB01219 | -11,48 | 81,70 | 1425,92 | 1,06 | 40,18  | 1,20 | Dantrolene                | 0,18319064 |
| 848  | DB01140 | -11,49 | 82,19 | 1526,32 | 1,26 | 34,12  | 2,09 | Cefadroxil                | 0,18378869 |
| 649  | DB00899 | -12,18 | 89,96 | 1612,27 | 1,11 | 60,22  | 0,34 | Remifentanil              | 0,18389297 |
| 766  | DB01039 | -12,14 | 87,84 | 1508,67 | 0,97 | 76,85  | 0,12 | Fenofibrate               | 0,18398741 |
| 239  | DB00402 | -11,12 | 84,43 | 1643,07 | 0,60 | 16,11  | 0,40 | Eszopiclone               | 0,18628529 |
| 413  | DB00614 | -8,11  | 67,60 | 1002,14 | 1,20 | 10,66  | 1,99 | Furazolidone              | 0,18727425 |
| 982  | DB01333 | -12,04 | 79,31 | 1453,28 | 1,18 | 47,68  | 1,78 | Cefradine                 | 0,18776545 |
| 899  | DB01198 | -11,12 | 84,56 | 1642,93 | 0,60 | 16,10  | 0,40 | Zopiclone                 | 0,18788117 |
| 227  | DB00387 | -11,53 | 77,84 | 1238,00 | 0,61 | 82,45  | 0,00 | Procyclidine              | 0,18849209 |
| 319  | DB00498 | -10,28 | 70,45 | 1009,23 | 0,63 | 84,43  | 0,23 | Phenindione               | 0,18874979 |
| 917  | DB01217 | -11,51 | 80,45 | 1297,75 | 0,78 | 74,36  | 0,00 | Anastrozole               | 0,18884692 |
| 63   | DB00186 | -11,26 | 79,84 | 1253,04 | 0,94 | 71,05  | 0,44 | Lorazepam                 | 0,18899393 |
| 3849 | DB06262 | -7,83  | 65,93 | 962,28  | 1,16 | 14,60  | 1,68 | Droxidopa                 | 0,190463   |
| 506  | DB00727 | -7,54  | 62,97 | 987,27  | 1,64 | 0,00   | 2,70 | Nitroglycerin             | 0,19082695 |
| 138  | DB00282 | -7,41  | 68,72 | 950,67  | 1,43 | 0,00   | 2,15 | Pamidronate               | 0,19091818 |
| 365  | DB00553 | -8,78  | 69,15 | 1013,89 | 1,20 | 35,23  | 1,46 | Methoxsalen               | 0,19129544 |
| 470  | DB00683 | -11,85 | 79,12 | 1380,53 | 0,77 | 73,22  | 0,00 | Midazolam                 | 0,19208145 |
| 433  | DB00639 | -12,29 | 82,94 | 1495,52 | 0,76 | 64,60  | 0,00 | Butoconazole              | 0,193041   |
| 968  | DB01295 | -11,96 | 79,83 | 1510,40 | 0,97 | 55,58  | 0,35 | Bevantolol                | 0,19414988 |
| 126  | DB00269 | -12,51 | 82,78 | 1630,39 | 1,04 | 76,33  | 0,14 | Chlorotrianisene          | 0,19419476 |
| 841  | DB01133 | -9,08  | 75,78 | 1106,26 | 1,66 | 22,19  | 2,21 | Tiludronate               | 0,19486538 |
| 714  | DB00977 | -12,16 | 83,65 | 1330,12 | 0,78 | 103,58 | 0,10 | Ethinyl Estradiol         | 0,19534579 |
| 879  | DB01176 | -11,16 | 76,35 | 1199,45 | 0,74 | 82,17  | 0,00 | Cyclizine                 | 0,19631699 |
| 779  | DB01057 | -7,23  | 57,79 | 942,85  | 0,66 | 11,09  | 0,81 | Echothiophate             | 0,19654652 |
| 893  | DB01192 | -11,47 | 81,00 | 1351,14 | 1,16 | 58,37  | 0,93 | Oxymorphone               | 0,19691318 |
| 5555 | DB08801 | -11,38 | 79,18 | 1290,62 | 0,93 | 94,71  | 0,07 | Dimethindene              | 0,19878003 |
| 263  | DB00428 | -8,64  | 71,53 | 1112,24 | 1,46 | 0,00   | 2,71 | Streptozocin              | 0,19936365 |

|      |         |        |       |         |      |        |      |                  |            |
|------|---------|--------|-------|---------|------|--------|------|------------------|------------|
| 54   | DB00175 | -12,58 | 94,44 | 1779,05 | 2,48 | 70,34  | 0,68 | Pravastatin      | 0,19947904 |
| 818  | DB01102 | -12,24 | 81,88 | 1417,87 | 1,05 | 65,37  | 1,03 | Arbutamine       | 0,19984439 |
| 498  | DB00715 | -11,96 | 79,22 | 1449,69 | 0,90 | 64,92  | 0,24 | Paroxetine       | 0,20041066 |
| 175  | DB00325 | -6,85  | 57,79 | 950,74  | 1,32 | 0,00   | 1,71 | Nitroprusside    | 0,20108342 |
| 574  | DB00808 | -12,52 | 82,59 | 1458,94 | 1,07 | 62,70  | 1,29 | Indapamide       | 0,2012249  |
| 597  | DB00833 | -12,08 | 76,62 | 1466,04 | 1,31 | 43,66  | 2,33 | Cefaclor         | 0,20122927 |
| 768  | DB01043 | -9,42  | 65,33 | 916,69  | 0,60 | 82,03  | 0,00 | Memantine        | 0,20181811 |
| 586  | DB00822 | -7,65  | 59,90 | 975,07  | 0,32 | 21,55  | 0,00 | Disulfiram       | 0,20384988 |
| 1009 | DB01392 | -12,79 | 79,98 | 1563,90 | 0,84 | 62,71  | 0,65 | Yohimbine        | 0,20559126 |
| 781  | DB01059 | -10,84 | 71,79 | 1433,51 | 1,03 | 23,81  | 1,58 | Norfloxacin      | 0,20695627 |
| 613  | DB00853 | -7,17  | 67,99 | 980,51  | 1,40 | 0,00   | 1,49 | Temozolomide     | 0,2070806  |
| 218  | DB00372 | -12,37 | 90,89 | 1599,67 | 0,86 | 46,05  | 0,00 | Thiethylperazine | 0,2071541  |
| 318  | DB00497 | -11,88 | 84,47 | 1378,42 | 0,98 | 62,13  | 0,70 | Oxycodone        | 0,20725754 |
| 831  | DB01120 | -11,73 | 80,36 | 1353,45 | 1,11 | 65,65  | 0,89 | Gliclazide       | 0,20812732 |
| 483  | DB00697 | -7,94  | 64,23 | 984,18  | 0,42 | 26,56  | 0,00 | Tizanidine       | 0,20905453 |
| 469  | DB00682 | -12,24 | 83,92 | 1373,97 | 0,74 | 74,62  | 0,30 | Warfarin         | 0,20929235 |
| 57   | DB00179 | -12,11 | 77,57 | 1358,75 | 1,18 | 75,62  | 1,17 | Masoprocol       | 0,21069995 |
| 638  | DB00884 | -8,98  | 78,29 | 1106,01 | 2,07 | 10,45  | 3,18 | Risedronate      | 0,21118534 |
| 517  | DB00744 | -8,98  | 66,99 | 994,32  | 0,91 | 42,04  | 1,29 | Zileuton         | 0,21259752 |
| 513  | DB00739 | -13,49 | 81,68 | 1658,02 | 1,23 | 55,76  | 1,89 | Hetacillin       | 0,21430904 |
| 1033 | DB01425 | -11,36 | 83,18 | 1413,40 | 1,13 | 36,48  | 1,34 | Alizapride       | 0,21484339 |
| 755  | DB01025 | -11,44 | 77,36 | 1335,29 | 1,46 | 65,88  | 1,24 | Amlexanox        | 0,21514234 |
| 1157 | DB01623 | -12,29 | 79,89 | 1826,25 | 1,35 | 52,55  | 0,07 | Thiothixene      | 0,21558666 |
| 354  | DB00542 | -14,36 | 95,25 | 1867,23 | 2,01 | 79,83  | 1,83 | Benazepril       | 0,2163733  |
| 376  | DB00567 | -11,69 | 76,18 | 1468,88 | 1,37 | 38,08  | 2,09 | Cephalexin       | 0,21658117 |
| 252  | DB00417 | -11,75 | 75,51 | 1489,31 | 1,25 | 37,12  | 1,93 | Penicillin V     | 0,21691209 |
| 182  | DB00333 | -12,03 | 83,90 | 1389,56 | 0,83 | 93,63  | 0,00 | Methadone        | 0,21835375 |
| 488  | DB00703 | -7,18  | 63,49 | 919,17  | 1,30 | 5,60   | 1,84 | Methazolamide    | 0,22271875 |
| 906  | DB01206 | -8,02  | 62,59 | 937,21  | 0,66 | 31,13  | 0,72 | Lomustine        | 0,22311005 |
| 650  | DB00900 | -7,73  | 73,72 | 1063,53 | 0,94 | 10,94  | 0,82 | Didanosine       | 0,22344685 |
| 5557 | DB08803 | -8,67  | 62,35 | 1029,21 | 0,52 | 59,48  | 0,01 | Tymazoline       | 0,22348723 |
| 406  | DB00607 | -13,08 | 86,49 | 1762,91 | 1,55 | 49,99  | 2,05 | Nafcillin        | 0,22373176 |
| 786  | DB01064 | -8,21  | 63,53 | 954,41  | 0,94 | 33,67  | 1,08 | Isoproterenol    | 0,22567195 |
| 3842 | DB05266 | -8,83  | 68,88 | 1014,99 | 0,67 | 61,24  | 0,13 | Ibudilast        | 0,2257024  |
| 247  | DB00411 | -4,32  | 38,61 | 631,63  | 0,73 | 0,00   | 1,80 | Carbachol        | 0,22753224 |
| 782  | DB01060 | -11,22 | 77,97 | 1553,21 | 1,09 | 29,85  | 1,64 | Amoxicillin      | 0,22795331 |
| 554  | DB00783 | -10,98 | 77,85 | 1210,50 | 1,17 | 97,17  | 0,32 | Estradiol        | 0,22894573 |
| 369  | DB00558 | -10,17 | 73,15 | 1412,06 | 1,53 | 5,89   | 2,82 | Zanamivir        | 0,22993788 |
| 293  | DB00467 | -9,56  | 65,80 | 1415,75 | 0,95 | 13,60  | 1,36 | Enoxacin         | 0,23103958 |
| 87   | DB00219 | -12,29 | 78,56 | 1527,93 | 0,96 | 65,34  | 0,23 | Oxyphenonium     | 0,2311587  |
| 114  | DB00254 | -14,22 | 88,59 | 1938,38 | 1,77 | 52,58  | 2,63 | Doxycycline      | 0,2317467  |
| 390  | DB00587 | -12,96 | 97,48 | 1735,32 | 1,35 | 81,51  | 0,58 | Cinalukast       | 0,23223546 |
| 660  | DB00914 | -8,54  | 61,53 | 919,44  | 0,57 | 53,54  | 0,36 | Phenformin       | 0,23239672 |
| 576  | DB00811 | -8,33  | 76,14 | 1043,38 | 1,30 | 0,00   | 2,26 | Ribavirin        | 0,23305279 |
| 392  | DB00589 | -12,58 | 84,11 | 1520,38 | 0,74 | 64,67  | 0,18 | Lisuride         | 0,23610142 |
| 241  | DB00404 | -11,65 | 75,72 | 1306,17 | 0,79 | 81,65  | 0,04 | Alprazolam       | 0,23726183 |
| 3837 | DB04948 | -8,30  | 67,99 | 993,76  | 0,59 | 35,57  | 0,00 | Lofexidine       | 0,23765913 |
| 3817 | DB04837 | -11,03 | 77,31 | 1210,76 | 1,04 | 81,28  | 0,10 | Chlophedianol    | 0,23813397 |
| 647  | DB00897 | -11,93 | 79,98 | 1370,25 | 0,78 | 76,24  | 0,00 | Triazolam        | 0,23844773 |
| 303  | DB00478 | -9,31  | 66,36 | 925,77  | 1,01 | 80,24  | 0,36 | Rimantadine      | 0,24358791 |
| 493  | DB00709 | -7,24  | 65,03 | 987,00  | 0,86 | 5,16   | 0,64 | Lamivudine       | 0,24414986 |
| 224  | DB00382 | -8,98  | 66,54 | 893,48  | 0,64 | 66,96  | 0,33 | Tacrine          | 0,24492264 |
| 777  | DB01055 | -7,06  | 63,81 | 905,06  | 1,16 | 5,41   | 1,55 | Mimosine         | 0,24576935 |
| 751  | DB01019 | -4,89  | 38,84 | 674,95  | 0,98 | 4,44   | 2,15 | Bethanechol      | 0,24716803 |
| 112  | DB00252 | -10,97 | 84,30 | 1271,66 | 2,14 | 73,42  | 1,09 | Phenytoin        | 0,24790302 |
| 82   | DB00213 | -11,50 | 74,92 | 1618,04 | 0,68 | 24,12  | 0,37 | Pantoprazole     | 0,2483156  |
| 217  | DB00371 | -8,02  | 62,63 | 976,32  | 1,16 | 29,21  | 1,22 | Meprobamate      | 0,24870077 |
| 177  | DB00327 | -11,10 | 79,18 | 1308,38 | 1,45 | 66,16  | 0,74 | Hydromorphone    | 0,24870944 |
| 514  | DB00740 | -8,42  | 74,34 | 992,12  | 1,30 | 30,62  | 1,16 | Riluzole         | 0,24899247 |
| 804  | DB01085 | -7,97  | 61,86 | 947,25  | 0,73 | 31,22  | 0,70 | Pilocarpine      | 0,25030077 |
| 463  | DB00675 | -12,77 | 94,35 | 1672,69 | 1,75 | 106,64 | 0,02 | Tamoxifen        | 0,25110078 |
| 560  | DB00791 | -7,65  | 71,95 | 995,31  | 1,14 | 10,93  | 0,92 | Uracil mustard   | 0,2528712  |
| 532  | DB00759 | -13,99 | 90,92 | 1963,86 | 2,44 | 40,79  | 3,52 | Tetracycline     | 0,2529673  |
| 604  | DB00841 | -11,90 | 81,18 | 1354,98 | 1,16 | 70,75  | 0,87 | Dobutamine       | 0,25412604 |
| 895  | DB01194 | -10,62 | 77,99 | 1426,36 | 1,22 | 17,04  | 1,56 | Brinzolamide     | 0,2545122  |
| 837  | DB01127 | -12,30 | 82,56 | 1465,14 | 0,81 | 70,90  | 0,00 | Econazole        | 0,25538367 |
| 894  | DB01193 | -11,84 | 78,69 | 1500,03 | 1,22 | 45,14  | 1,27 | Acebutolol       | 0,25707802 |
| 892  | DB01191 | -9,23  | 73,44 | 1017,59 | 0,93 | 76,66  | 0,00 | Dexfenfluramine  | 0,25788862 |
| 122  | DB00265 | -8,86  | 60,06 | 919,98  | 0,55 | 70,96  | 0,38 | Crotamiton       | 0,25823492 |

|      |         |        |        |         |      |        |      |                        |            |
|------|---------|--------|--------|---------|------|--------|------|------------------------|------------|
| 752  | DB01020 | -7,33  | 72,27  | 947,97  | 1,55 | 4,86   | 1,70 | Isosorbide Mononitrate | 0,2583354  |
| 726  | DB00991 | -11,98 | 75,99  | 1320,40 | 0,90 | 83,89  | 0,48 | Oxaprozín              | 0,2587657  |
| 928  | DB01231 | -12,26 | 87,74  | 1349,81 | 0,88 | 102,75 | 0,06 | Diphenidol             | 0,25901037 |
| 807  | DB01088 | -12,63 | 102,38 | 1817,60 | 2,40 | 100,52 | 1,22 | Iloprost               | 0,26011017 |
| 100  | DB00236 | -7,59  | 59,36  | 1034,68 | 0,75 | 19,77  | 0,90 | Pipobroman             | 0,2609595  |
| 570  | DB00804 | -12,14 | 81,28  | 1318,05 | 0,66 | 85,12  | 0,04 | Dicyclomine            | 0,26101053 |
| 3890 | DB06775 | -7,03  | 67,70  | 943,51  | 1,48 | 1,39   | 1,62 | Carglumic acid         | 0,26447314 |
| 937  | DB01242 | -11,59 | 78,87  | 1297,25 | 0,87 | 80,57  | 0,00 | Clomipramine           | 0,26471275 |
| 428  | DB00633 | -8,97  | 64,08  | 933,26  | 0,83 | 70,85  | 0,15 | Dexmedetomidine        | 0,26514566 |
| 742  | DB01009 | -11,32 | 77,49  | 1138,64 | 0,86 | 86,15  | 0,66 | Ketoprofen             | 0,2659185  |
| 973  | DB01320 | -13,20 | 85,39  | 1507,70 | 1,09 | 75,56  | 1,11 | Fosphenytoin           | 0,2668981  |
| 741  | DB01008 | -7,01  | 59,44  | 901,06  | 0,79 | 9,76   | 0,98 | Busulfan               | 0,2693364  |
| 1161 | DB01628 | -12,22 | 85,13  | 1421,95 | 0,82 | 70,05  | 0,16 | Etoricoxib             | 0,26997212 |
| 994  | DB01353 | -8,56  | 72,38  | 1018,87 | 1,12 | 37,11  | 0,63 | Butethal               | 0,2706781  |
| 1128 | DB01587 | -12,42 | 72,92  | 1572,61 | 0,95 | 59,84  | 0,70 | Ketazolam              | 0,27284843 |
| 705  | DB00968 | -8,40  | 70,09  | 1003,90 | 1,49 | 34,54  | 1,32 | Methyl dopa            | 0,27341747 |
| 627  | DB00871 | -8,24  | 65,74  | 1014,91 | 0,80 | 39,08  | 0,78 | Terbutaline            | 0,27453995 |
| 538  | DB00766 | -7,69  | 73,44  | 1016,67 | 1,63 | 12,09  | 1,71 | Clavulanate            | 0,27518195 |
| 3894 | DB06804 | -8,98  | 58,97  | 1343,30 | 1,25 | 23,09  | 0,33 | Nonoxynol-9            | 0,27585566 |
| 399  | DB00598 | -12,65 | 84,16  | 1476,67 | 1,72 | 73,29  | 1,55 | Labetalol              | 0,27850938 |
| 3853 | DB06288 | -11,44 | 79,48  | 1529,91 | 0,99 | 32,03  | 0,74 | Amisulpride            | 0,2791527  |
| 450  | DB00660 | -8,53  | 64,76  | 991,10  | 0,78 | 50,11  | 0,87 | Metaxalone             | 0,27933502 |
| 654  | DB00906 | -12,50 | 87,34  | 1509,75 | 1,09 | 57,48  | 0,87 | Tiagabine              | 0,2816737  |
| 577  | DB00812 | -12,20 | 74,53  | 1421,67 | 0,95 | 77,61  | 0,50 | Phenylbutazone         | 0,2824118  |
| 185  | DB00336 | -7,31  | 63,74  | 901,71  | 1,13 | 11,00  | 1,63 | Nitrofurazone          | 0,2834242  |
| 178  | DB00328 | -12,45 | 77,92  | 1542,22 | 1,07 | 60,57  | 0,85 | Indomethacin           | 0,28444546 |
| 104  | DB00241 | -9,05  | 76,50  | 1085,91 | 1,47 | 48,85  | 0,42 | Butalbital             | 0,28674832 |
| 821  | DB01105 | -11,19 | 73,59  | 1140,01 | 0,71 | 93,80  | 0,00 | Sibutramine            | 0,2869654  |
| 1156 | DB01622 | -12,67 | 90,11  | 1788,10 | 0,87 | 36,89  | 0,08 | Thiopropazine          | 0,2871964  |
| 840  | DB01132 | -12,51 | 86,56  | 1520,00 | 1,23 | 55,69  | 1,16 | Pioglitazone           | 0,28928676 |
| 284  | DB00455 | -13,02 | 90,04  | 1611,64 | 0,93 | 84,91  | 0,12 | Loratadine             | 0,29039687 |
| 828  | DB01116 | -12,98 | 84,07  | 1581,11 | 0,71 | 69,17  | 0,01 | Trimethaphan           | 0,2909698  |
| 953  | DB01261 | -13,04 | 92,62  | 1729,47 | 0,85 | 51,87  | 0,17 | Sitagliptin            | 0,29169    |
| 306  | DB00482 | -12,35 | 79,07  | 1622,45 | 1,46 | 64,89  | 1,15 | Celecoxib              | 0,2936131  |
| 1151 | DB01616 | -11,76 | 72,90  | 1298,03 | 0,77 | 89,14  | 0,00 | Alverine               | 0,29433858 |
| 5550 | DB08795 | -12,28 | 82,29  | 1582,93 | 1,08 | 36,44  | 1,40 | Azidocillin            | 0,29579294 |
| 1025 | DB01414 | -10,65 | 73,48  | 1443,41 | 1,29 | 11,90  | 2,14 | Cefacetrile            | 0,29780528 |
| 427  | DB00632 | -11,51 | 90,55  | 1347,18 | 1,71 | 94,20  | 0,26 | Docosanol              | 0,3002839  |
| 961  | DB01274 | -12,25 | 83,71  | 1525,57 | 1,09 | 52,90  | 0,80 | Arformoterol           | 0,30139858 |
| 719  | DB00983 | -12,25 | 83,71  | 1525,57 | 1,09 | 52,90  | 0,80 | Formoterol             | 0,30139858 |
| 745  | DB01012 | -12,90 | 89,18  | 1587,25 | 1,11 | 113,73 | 0,00 | Cinacalcet             | 0,3022794  |
| 331  | DB00514 | -11,59 | 77,21  | 1194,70 | 0,71 | 93,20  | 0,02 | Dextromethorphan       | 0,30669912 |
| 887  | DB01184 | -13,88 | 97,65  | 1839,22 | 1,32 | 64,10  | 1,02 | Domperidone            | 0,30817395 |
| 794  | DB01073 | -10,17 | 77,85  | 1487,79 | 1,19 | 7,64   | 1,78 | Fludarabine            | 0,30862266 |
| 270  | DB00436 | -13,71 | 89,73  | 1667,46 | 1,24 | 58,25  | 1,57 | Bendroflumethiazide    | 0,3087716  |
| 1148 | DB01613 | -9,07  | 77,09  | 1218,96 | 1,96 | 0,00   | 3,77 | Erythryl Tetranitrate  | 0,30888745 |
| 527  | DB00754 | -8,46  | 68,93  | 958,70  | 1,19 | 43,09  | 0,94 | Ethotoin               | 0,30911487 |
| 179  | DB00330 | -6,98  | 54,97  | 868,58  | 0,45 | 16,37  | 0,60 | Ethambutol             | 0,3100084  |
| 665  | DB00919 | -10,74 | 76,48  | 1382,63 | 1,54 | 10,80  | 3,08 | Spectinomycin          | 0,31197047 |
| 552  | DB00781 | -19,73 | 146,47 | 3796,71 | 6,29 | 32,35  | 0,41 | Polymyxin B Sulfate    | 0,31235164 |
| 307  | DB00483 | -12,84 | 88,03  | 1791,81 | 1,16 | 40,88  | 0,01 | Gallamine Triethiodide | 0,31459147 |
| 583  | DB00819 | -6,89  | 62,47  | 874,23  | 1,20 | 6,00   | 1,63 | Acetazolamide          | 0,31465873 |
| 666  | DB00920 | -11,51 | 79,73  | 1307,46 | 1,14 | 80,11  | 0,15 | Ketotifen              | 0,31605613 |
| 764  | DB01036 | -12,26 | 82,48  | 1415,56 | 0,96 | 101,07 | 0,01 | Tolterodine            | 0,31723887 |
| 1028 | DB01418 | -13,16 | 89,35  | 1584,63 | 1,15 | 62,49  | 0,99 | Acenocoumarol          | 0,32138917 |
| 192  | DB00343 | -10,18 | 81,55  | 1594,04 | 1,97 | 45,56  | 0,31 | Diltiazem              | 0,3216363  |
| 157  | DB00305 | -11,13 | 66,64  | 1469,74 | 1,59 | 17,50  | 3,24 | Mitomycin              | 0,3219527  |
| 55   | DB00176 | -11,92 | 85,84  | 1329,61 | 0,96 | 75,61  | 0,28 | Fluvoxamine            | 0,32200098 |
| 634  | DB00878 | -12,49 | 107,68 | 1894,32 | 2,53 | 49,93  | 0,00 | Chlorhexidine          | 0,32349396 |
| 563  | DB00795 | -12,20 | 88,09  | 1692,35 | 1,08 | 39,62  | 0,98 | Sulfasalazine          | 0,3237723  |
| 987  | DB01340 | -14,40 | 86,79  | 1815,02 | 1,39 | 60,22  | 1,72 | Cilazapril             | 0,32504922 |
| 679  | DB00934 | -11,21 | 77,80  | 1231,04 | 1,16 | 105,62 | 0,03 | Maprotiline            | 0,32600015 |
| 1160 | DB01627 | -11,21 | 76,47  | 1657,79 | 0,94 | 37,28  | 1,26 | Lincomycin             | 0,32652432 |
| 897  | DB01196 | -13,06 | 93,18  | 1729,91 | 1,25 | 96,38  | 0,04 | Estramustine           | 0,3297508  |
| 189  | DB00340 | -11,79 | 77,99  | 1315,38 | 0,89 | 84,94  | 0,01 | Metixene               | 0,33218414 |
| 5565 | DB08811 | -12,80 | 85,86  | 1649,02 | 1,12 | 59,45  | 0,15 | Tofisopam              | 0,33394125 |
| 1132 | DB01594 | -12,25 | 81,84  | 1534,59 | 1,48 | 53,27  | 1,38 | Cinolazepam            | 0,33744758 |
| 702  | DB00964 | -7,70  | 63,22  | 976,78  | 0,70 | 23,77  | 0,28 | Apraclonidine          | 0,33834812 |
| 237  | DB00399 | -7,95  | 76,05  | 1097,72 | 1,96 | 0,00   | 2,88 | Zoledronate            | 0,3394068  |

|      |         |        |        |         |      |        |      |                      |            |
|------|---------|--------|--------|---------|------|--------|------|----------------------|------------|
| 886  | DB01183 | -12,70 | 86,52  | 1428,76 | 1,07 | 78,73  | 0,67 | Naloxone             | 0,33960915 |
| 496  | DB00713 | -13,14 | 83,58  | 1687,35 | 1,18 | 47,22  | 1,35 | Oxacillin            | 0,33968383 |
| 489  | DB00704 | -13,16 | 92,41  | 1498,17 | 0,90 | 75,38  | 0,45 | Naltrexone           | 0,33969253 |
| 750  | DB01018 | -8,54  | 69,08  | 967,84  | 1,10 | 47,27  | 0,61 | Guanfacine           | 0,3411402  |
| 709  | DB00972 | -13,06 | 92,78  | 1609,65 | 0,93 | 83,00  | 0,02 | Azelastine           | 0,3412185  |
| 297  | DB00472 | -11,96 | 81,79  | 1325,67 | 0,86 | 82,18  | 0,09 | Fluoxetine           | 0,34157938 |
| 925  | DB01227 | -12,76 | 76,80  | 1556,19 | 1,10 | 82,46  | 0,05 | Levomethadyl Acetate | 0,3416283  |
| 1039 | DB01433 | -12,76 | 76,80  | 1556,19 | 1,10 | 82,46  | 0,05 | Methadyl Acetate     | 0,3416283  |
| 663  | DB00917 | -13,19 | 87,09  | 1522,13 | 1,04 | 77,62  | 0,67 | Dinoprostone         | 0,3433975  |
| 3839 | DB05246 | -8,80  | 69,69  | 978,59  | 1,14 | 57,96  | 0,34 | Methsuximide         | 0,34418747 |
| 926  | DB01228 | -12,82 | 90,37  | 1550,95 | 0,92 | 75,81  | 0,10 | Encainide            | 0,34612572 |
| 718  | DB00982 | -12,87 | 78,57  | 1346,45 | 1,10 | 103,72 | 0,72 | Isotretinoin         | 0,3503664  |
| 476  | DB00689 | -13,28 | 78,98  | 1723,73 | 1,30 | 47,76  | 1,69 | Cephaloglycin        | 0,35065567 |
| 845  | DB01137 | -10,93 | 80,77  | 1598,06 | 0,99 | 23,24  | 0,82 | Levofloxacin         | 0,35131216 |
| 869  | DB01165 | -10,93 | 80,77  | 1598,06 | 0,99 | 23,24  | 0,82 | Ofloxacin            | 0,35131216 |
| 207  | DB00360 | -8,60  | 70,49  | 1053,85 | 1,41 | 8,06   | 2,65 | Tetrahydrobiopterin  | 0,3514958  |
| 133  | DB00276 | -13,05 | 77,63  | 1705,51 | 0,98 | 61,85  | 0,26 | Amsacrine            | 0,35165018 |
| 1139 | DB01603 | -11,14 | 76,97  | 1583,78 | 1,09 | 30,73  | 1,39 | Meticillin           | 0,3520971  |
| 1035 | DB01427 | -7,77  | 60,34  | 894,86  | 0,85 | 27,73  | 1,27 | Amrinone             | 0,3528639  |
| 853  | DB01145 | -12,31 | 92,40  | 1543,86 | 1,06 | 42,65  | 0,78 | Sulfoxone            | 0,35306963 |
| 3836 | DB04942 | -14,48 | 87,53  | 1586,72 | 1,12 | 102,18 | 0,93 | Tamibarotene         | 0,35358208 |
| 204  | DB00357 | -9,16  | 85,87  | 1181,15 | 2,38 | 63,66  | 0,54 | Aminoglutethimide    | 0,35527945 |
| 844  | DB01136 | -13,12 | 88,40  | 1770,08 | 1,23 | 80,58  | 0,36 | Carvedilol           | 0,35779545 |
| 1127 | DB01586 | -14,42 | 98,19  | 1675,43 | 1,37 | 112,86 | 0,55 | Ursodeoxycholic acid | 0,35893664 |
| 820  | DB01104 | -11,50 | 76,09  | 1188,08 | 0,80 | 94,96  | 0,02 | Sertraline           | 0,36359352 |
| 397  | DB00595 | -15,35 | 94,13  | 2018,29 | 2,04 | 43,39  | 3,04 | Oxytetracycline      | 0,3638256  |
| 3606 | DB04574 | -13,50 | 85,92  | 1464,88 | 1,16 | 95,49  | 0,88 | Estropipate          | 0,3671679  |
| 3855 | DB06689 | -12,86 | 88,86  | 1412,41 | 1,65 | 82,27  | 1,55 | Ethanolamine Oleate  | 0,3681562  |
| 375  | DB00566 | -5,68  | 49,05  | 737,33  | 0,75 | 0,00   | 1,31 | Succimer             | 0,36843932 |
| 338  | DB00523 | -12,96 | 79,83  | 1343,26 | 1,11 | 106,08 | 0,69 | Alitretinoin         | 0,37148607 |
| 850  | DB01142 | -11,61 | 78,51  | 1227,39 | 0,85 | 90,95  | 0,02 | Doxepin              | 0,37160963 |
| 3851 | DB06274 | -12,37 | 93,83  | 1452,17 | 2,25 | 94,29  | 1,11 | Alvimopan            | 0,37217438 |
| 429  | DB00634 | -7,85  | 69,85  | 914,91  | 1,02 | 25,89  | 1,03 | Sulfacetamide        | 0,37231916 |
| 553  | DB00782 | -13,35 | 87,11  | 1611,40 | 0,81 | 71,06  | 0,22 | Proprantherline      | 0,37300953 |
| 1004 | DB01380 | -13,98 | 96,34  | 1775,05 | 1,35 | 83,42  | 0,73 | Cortisone acetate    | 0,37303758 |
| 271  | DB00437 | -5,74  | 50,14  | 757,78  | 0,43 | 0,64   | 0,66 | Allopurinol          | 0,37310827 |
| 686  | DB00943 | -7,62  | 69,23  | 1008,19 | 1,18 | 14,89  | 0,72 | Zalcitabine          | 0,3783324  |
| 854  | DB01146 | -11,95 | 80,74  | 1238,75 | 0,77 | 94,95  | 0,01 | Diphenylpyraline     | 0,37893787 |
| 1130 | DB01589 | -12,68 | 85,65  | 1484,01 | 0,82 | 76,22  | 0,00 | Quazepam             | 0,38246936 |
| 747  | DB01014 | -12,91 | 92,16  | 1589,40 | 1,33 | 50,11  | 1,37 | Balsalazide          | 0,38595545 |
| 194  | DB00345 | -7,87  | 66,09  | 896,48  | 0,87 | 30,37  | 0,97 | Aminohippurate       | 0,38853538 |
| 3831 | DB04890 | -13,50 | 89,51  | 1645,79 | 1,02 | 66,13  | 0,62 | Bepotastine          | 0,38867533 |
| 630  | DB00874 | -7,58  | 55,87  | 880,67  | 0,90 | 24,72  | 1,60 | Guaifenesin          | 0,39422327 |
| 211  | DB00365 | -11,76 | 75,60  | 1572,85 | 1,01 | 33,60  | 1,08 | Grepafloxacin        | 0,39597502 |
| 931  | DB01235 | -7,58  | 66,25  | 922,95  | 1,24 | 22,22  | 1,25 | Levodopa             | 0,39708722 |
| 59   | DB00181 | -8,20  | 64,44  | 924,57  | 1,03 | 43,63  | 0,81 | Baclofen             | 0,39812487 |
| 368  | DB00557 | -12,91 | 90,26  | 1563,87 | 1,12 | 75,78  | 0,40 | Hydroxyzine          | 0,4003253  |
| 595  | DB00831 | -13,34 | 90,15  | 1687,70 | 0,85 | 61,11  | 0,00 | Trifluoperazine      | 0,40122485 |
| 770  | DB01045 | -18,66 | 138,24 | 3342,79 | 5,95 | 66,88  | 0,44 | Rifampin             | 0,40269056 |
| 1006 | DB01384 | -14,27 | 96,63  | 1677,43 | 0,97 | 75,39  | 0,60 | Paramethasone        | 0,40375522 |
| 3838 | DB04967 | -12,43 | 87,23  | 1428,56 | 0,98 | 75,10  | 0,27 | Lucanthone           | 0,40420648 |
| 334  | DB00519 | -15,02 | 92,22  | 1845,55 | 1,60 | 75,43  | 1,58 | Trandolapril         | 0,40456903 |
| 248  | DB00412 | -12,19 | 93,35  | 1508,99 | 1,23 | 44,95  | 0,94 | Rosiglitazone        | 0,4051776  |
| 516  | DB00742 | -6,55  | 66,67  | 874,30  | 1,74 | 0,00   | 1,92 | Mannitol             | 0,40638065 |
| 123  | DB00266 | -12,89 | 85,24  | 1531,75 | 1,17 | 71,96  | 0,71 | Dicumarol            | 0,4077497  |
| 418  | DB00620 | -14,21 | 92,24  | 1700,23 | 1,13 | 74,55  | 0,84 | Triamcinolone        | 0,41061842 |
| 923  | DB01224 | -12,72 | 88,00  | 1627,69 | 1,10 | 55,44  | 0,30 | Quetiapine           | 0,41078418 |
| 120  | DB00262 | -6,33  | 53,98  | 784,36  | 0,67 | 9,49   | 1,01 | Carmustine           | 0,41090983 |
| 858  | DB01150 | -12,97 | 84,39  | 1680,98 | 1,35 | 38,79  | 1,82 | Cefprozil            | 0,4118759  |
| 452  | DB00662 | -12,47 | 92,72  | 1678,32 | 1,23 | 40,07  | 0,26 | Trimethobenzamide    | 0,41732848 |
| 324  | DB00504 | -12,66 | 83,80  | 1239,33 | 0,74 | 110,85 | 0,04 | Levallorphan         | 0,41895157 |
| 310  | DB00488 | -5,27  | 46,96  | 889,29  | 0,54 | 0,00   | 0,66 | Altretamine          | 0,4211977  |
| 976  | DB01324 | -11,83 | 82,60  | 1531,18 | 1,30 | 25,81  | 2,02 | Polythiazide         | 0,42221257 |
| 291  | DB00463 | -8,03  | 70,31  | 1038,40 | 1,39 | 25,20  | 0,78 | Metharbital          | 0,42260462 |
| 66   | DB00192 | -12,17 | 81,98  | 1406,98 | 1,17 | 84,41  | 0,03 | Indecainide          | 0,42376062 |
| 344  | DB00531 | -7,25  | 66,67  | 902,88  | 0,93 | 15,35  | 0,79 | Cyclophosphamide     | 0,4237621  |
| 3605 | DB04573 | -12,06 | 80,60  | 1259,26 | 0,91 | 96,01  | 0,17 | Estriol              | 0,42591864 |
| 537  | DB00765 | -8,31  | 65,55  | 965,63  | 1,30 | 44,54  | 0,90 | Metyrosine           | 0,42890894 |
| 5561 | DB08807 | -13,86 | 84,33  | 1686,29 | 0,73 | 77,49  | 0,10 | Bopindolol           | 0,4294578  |

|      |         |        |        |         |      |        |      |                              |            |
|------|---------|--------|--------|---------|------|--------|------|------------------------------|------------|
| 907  | DB01207 | -13,05 | 88,80  | 1537,80 | 0,99 | 73,42  | 0,38 | Ridogrel                     | 0,43001062 |
| 816  | DB01099 | -5,43  | 44,97  | 670,86  | 0,51 | 5,33   | 1,05 | Flucytosine                  | 0,43272004 |
| 908  | DB01208 | -11,79 | 82,85  | 1688,02 | 0,91 | 30,69  | 0,87 | Sparfloxacin                 | 0,432928   |
| 581  | DB00816 | -7,67  | 64,17  | 955,75  | 0,79 | 32,35  | 0,74 | Orciprenaline                | 0,4345712  |
| 343  | DB00530 | -13,09 | 86,97  | 1769,41 | 1,18 | 49,40  | 0,23 | Erlotinib                    | 0,43630356 |
| 1142 | DB01607 | -11,63 | 80,02  | 1541,75 | 1,19 | 20,46  | 1,91 | Ticarcillin                  | 0,43659633 |
| 729  | DB00996 | -7,95  | 61,67  | 892,39  | 0,88 | 40,45  | 0,82 | Gabapentin                   | 0,43779507 |
| 659  | DB00913 | -13,65 | 93,94  | 1579,89 | 1,02 | 77,75  | 0,51 | Anileridine                  | 0,4382459  |
| 851  | DB01143 | -6,22  | 56,30  | 773,03  | 0,82 | 5,94   | 1,21 | Amifostine                   | 0,43987662 |
| 662  | DB00916 | -6,72  | 59,96  | 895,49  | 0,94 | 7,07   | 0,88 | Metronidazole                | 0,44094524 |
| 515  | DB00741 | -13,69 | 90,19  | 1588,52 | 1,08 | 81,25  | 0,59 | Hydrocortisone               | 0,44362935 |
| 644  | DB00894 | -12,63 | 83,63  | 1315,81 | 0,85 | 100,27 | 0,11 | Testolactone                 | 0,4450126  |
| 494  | DB00711 | -6,46  | 54,96  | 892,93  | 0,74 | 11,43  | 0,84 | Diethylcarbamazine           | 0,44598162 |
| 873  | DB01170 | -7,64  | 62,73  | 875,47  | 0,94 | 28,72  | 1,15 | Guanethidine                 | 0,44663525 |
| 356  | DB00544 | -5,47  | 46,05  | 672,28  | 0,55 | 5,37   | 1,08 | Fluorouracil                 | 0,44841167 |
| 3848 | DB06209 | -13,17 | 89,03  | 1567,17 | 0,94 | 73,11  | 0,26 | Prasugrel                    | 0,45154408 |
| 134  | DB00277 | -6,67  | 64,14  | 973,65  | 1,20 | 0,00   | 0,65 | Theophylline                 | 0,45208982 |
| 78   | DB00209 | -9,86  | 85,16  | 1576,87 | 2,50 | 68,08  | 0,23 | Trospium                     | 0,45372966 |
| 645  | DB00895 | -13,47 | 100,87 | 1932,58 | 1,33 | 60,30  | 0,83 | Benzylpenicilloyl Polylysine | 0,45450738 |
| 351  | DB00539 | -13,61 | 94,30  | 1722,39 | 1,92 | 107,45 | 0,01 | Toremifene                   | 0,45467466 |
| 1023 | DB01412 | -6,64  | 62,13  | 950,05  | 1,23 | 0,00   | 0,96 | Theobromine                  | 0,45520824 |
| 308  | DB00485 | -14,05 | 88,43  | 1812,98 | 1,23 | 52,52  | 1,27 | Dicloxacillin                | 0,45627332 |
| 1030 | DB01422 | -7,20  | 58,49  | 904,15  | 0,87 | 27,92  | 1,07 | Nitroxoline                  | 0,4566698  |
| 424  | DB00629 | -8,17  | 63,02  | 888,38  | 0,92 | 48,31  | 0,73 | Guanabenz                    | 0,45737168 |
| 188  | DB00339 | -5,24  | 47,55  | 666,59  | 0,64 | 0,00   | 1,10 | Pyrazinamide                 | 0,458894   |
| 578  | DB00813 | -13,17 | 80,72  | 1546,35 | 0,85 | 85,82  | 0,04 | Fentanyl                     | 0,46045005 |
| 249  | DB00413 | -7,58  | 61,79  | 899,18  | 0,56 | 30,54  | 0,24 | Pramipexole                  | 0,46081793 |
| 401  | DB00600 | -8,47  | 63,30  | 911,46  | 0,55 | 66,60  | 0,24 | Monobenzone                  | 0,46089575 |
| 287  | DB00459 | -13,48 | 89,51  | 1465,23 | 1,53 | 97,16  | 1,06 | Acitretin                    | 0,4620203  |
| 519  | DB00746 | -12,15 | 98,53  | 1843,43 | 3,28 | 38,14  | 0,95 | Deferoxamine                 | 0,46304354 |
| 676  | DB00931 | -15,13 | 98,18  | 1967,49 | 1,93 | 48,03  | 2,43 | Methacycline                 | 0,464795   |
| 455  | DB00666 | -16,81 | 146,48 | 3473,84 | 8,58 | 41,04  | 0,75 | Nafarelin                    | 0,46494728 |
| 611  | DB00850 | -12,75 | 90,74  | 1626,50 | 1,09 | 51,01  | 0,45 | Perphenazine                 | 0,46788055 |
| 1011 | DB01394 | -12,75 | 83,16  | 1745,67 | 1,03 | 40,37  | 0,41 | Colchicine                   | 0,4691531  |
| 118  | DB00259 | -6,99  | 58,71  | 821,34  | 0,85 | 17,95  | 1,28 | Sulfanilamide                | 0,4712717  |
| 785  | DB01063 | -13,50 | 85,87  | 1744,35 | 0,93 | 56,46  | 0,43 | Acetophenazine               | 0,47128925 |
| 160  | DB00308 | -12,59 | 89,85  | 1573,58 | 1,26 | 61,51  | 0,30 | Ibutilide                    | 0,4717918  |
| 619  | DB00860 | -13,71 | 90,97  | 1596,06 | 1,11 | 80,84  | 0,58 | Prednisolone                 | 0,47266802 |
| 584  | DB00820 | -13,69 | 89,68  | 1751,89 | 0,91 | 57,02  | 0,39 | Tadalafil                    | 0,4727344  |
| 205  | DB00358 | -13,06 | 91,53  | 1608,60 | 1,09 | 73,96  | 0,13 | Mefloquine                   | 0,47441864 |
| 420  | DB00624 | -12,62 | 82,97  | 1254,03 | 0,87 | 110,59 | 0,09 | Testosterone                 | 0,47614366 |
| 101  | DB00237 | -8,51  | 73,88  | 1034,67 | 1,47 | 41,37  | 0,55 | Butabarbital                 | 0,47738534 |
| 445  | DB00652 | -12,18 | 80,05  | 1278,36 | 0,89 | 98,44  | 0,07 | Pentazocine                  | 0,47929832 |
| 959  | DB01268 | -13,60 | 87,34  | 1742,57 | 0,95 | 64,22  | 0,10 | Sunitinib                    | 0,48138756 |
| 501  | DB00719 | -12,07 | 81,59  | 1307,16 | 0,93 | 91,50  | 0,00 | Azatadine                    | 0,4814049  |
| 1010 | DB01393 | -12,91 | 89,23  | 1533,11 | 1,23 | 70,53  | 0,65 | Bezafibrate                  | 0,48185185 |
| 935  | DB01240 | -12,99 | 89,67  | 1505,40 | 1,12 | 76,79  | 0,48 | Epoprostenol                 | 0,48205236 |
| 479  | DB00693 | -13,20 | 92,01  | 1476,43 | 0,95 | 84,95  | 0,22 | Fluorescein                  | 0,48207188 |
| 606  | DB00844 | -13,82 | 97,04  | 1564,83 | 1,10 | 81,84  | 0,60 | Nalbuphine                   | 0,48296276 |
| 1140 | DB01605 | -13,33 | 92,84  | 1844,11 | 1,26 | 50,32  | 1,00 | Pivmecillinam                | 0,48473296 |
| 565  | DB00799 | -12,93 | 85,78  | 1512,29 | 1,11 | 78,46  | 0,45 | Tazarotene                   | 0,48539314 |
| 233  | DB00394 | -14,43 | 93,88  | 1699,50 | 1,05 | 82,35  | 0,55 | Beclomethasone               | 0,4900205  |
| 704  | DB00967 | -11,96 | 80,75  | 1312,76 | 1,03 | 90,78  | 0,00 | Desloratadine                | 0,4900353  |
| 387  | DB00583 | -6,05  | 55,12  | 770,81  | 1,12 | 5,34   | 1,48 | L-Carnitine                  | 0,49047345 |
| 107  | DB00245 | -9,29  | 78,46  | 1362,11 | 1,48 | 79,97  | 0,15 | Benzotropine                 | 0,49105293 |
| 568  | DB00802 | -13,64 | 86,75  | 1813,76 | 0,97 | 55,00  | 0,15 | Alfentanil                   | 0,49556094 |
| 277  | DB00443 | -14,36 | 90,84  | 1708,30 | 1,05 | 81,89  | 0,56 | Betamethasone                | 0,49584666 |
| 930  | DB01234 | -14,36 | 90,84  | 1708,30 | 1,05 | 81,89  | 0,56 | Dexamethasone                | 0,49584666 |
| 588  | DB00824 | -7,28  | 68,94  | 998,75  | 1,41 | 10,02  | 0,87 | Enprofylline                 | 0,496435   |
| 477  | DB00690 | -13,43 | 84,19  | 1620,86 | 0,92 | 79,85  | 0,08 | Flurazepam                   | 0,49877435 |
| 448  | DB00655 | -11,49 | 75,53  | 1202,68 | 1,08 | 98,41  | 0,10 | Estrone                      | 0,49951673 |
